# Supplementary material for: Synthesis and characterization of aminopyridine iron(ii) chloride catalysts for isoprene polymerization: sterically controlled monomer enchainment
Source: Royal Society of Chemistry journal article supplement (doi:10.1039/c9dt00452a), 2019-01-01

*Electronic supplementary information*

**Synthesis and characterization of aminopyridine iron(II) chloride catalysts for  
isoprene polymerization: sterically controlled monomer enchainment**

**Chuyang Jing,<sup>1,2†</sup> Liang Wang,<sup>1†</sup> Qaiser Mahmood,<sup>1</sup> Mengmeng Zhao,<sup>1</sup> Guangqian Zhu,<sup>1,2</sup> Xianhui Zhang,<sup>1,2</sup> Xiaowu Wang,<sup>1\*</sup>, Qinggang Wang<sup>1\*</sup>**

<sup>1</sup>Key Laboratory of Biobased Materials, Qingdao Institute of Bioenergy and Bioprocess Technology, Chinese Academy of Sciences, Qingdao, 266101, China.

<sup>2</sup>Center of Materials Science and Optoelectronics Engineering, University of Chinese Academy of Sciences, Beijing, 100049, China.

Correspondence: E-mail: wangqg@qibebt.ac.cn; wangxw@qibebt.ac.cn)

|                                                                                                       |    |
|-------------------------------------------------------------------------------------------------------|----|
| 1. Isoprene Polymerization Using Fe <sub>8H</sub> -Fe <sub>10H</sub> /MAO <sup>a</sup> .....          | 1  |
| 2. Synthesis of the pyridine-amide iron complex and its catalysis toward isoprene polymerization..... | 1  |
| 2. NMR Spectra of the Ligands .....                                                                   | 2  |
| 3. NMR Spectra of the Representative Polyisoprene .....                                               | 13 |
| 4. GPC Characterization of the Representative Polyisoprene .....                                      | 20 |
| 5. X-Ray Crystallography of Complexes .....                                                           | 25 |
| 6. NMR spectrum of L <sub>2H</sub> ligand deprotonated by AlMe <sub>3</sub> .....                     | 30 |

## 1. Isoprene Polymerization Using Fe<sub>8H</sub>-Fe<sub>10H</sub>/MAO<sup>a</sup>

| Entry | Cat.              | Yield % | Act. <sup>b</sup> | Microstructure(%) <sup>c</sup> |                   |      |
|-------|-------------------|---------|-------------------|--------------------------------|-------------------|------|
|       |                   |         |                   | <i>cis</i> -1,4                | <i>trans</i> -1,4 | 3,4- |
| 1     | Fe <sub>8H</sub>  | >99     | 81.6              | 33                             | 19                | 48   |
| 2     | Fe <sub>9H</sub>  | >99     | 81.6              | 31                             | 20                | 49   |
| 3     | Fe <sub>10H</sub> | >99     | 81.6              | 40                             | 10                | 50   |

<sup>a</sup> Polymerization conditions: solvent: 5 mL toluene; complex: 10 μmol; isoprene: 20 mmol; time: 10 min; T: 25 °C; MAO/Fe: 500; <sup>b</sup> 10<sup>4</sup> g·mol<sup>-1</sup>·h<sup>-1</sup>; <sup>c</sup> determined by <sup>1</sup>H NMR and <sup>13</sup>C NMR;

## 2. Synthesis of the pyridine-amide iron complex and its catalysis toward isoprene polymerization

### 2.1 Synthesis of the pyridine-amide iron complex

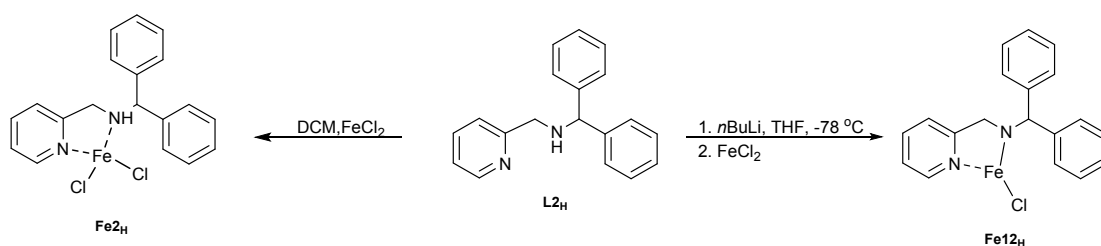

### 2.2 Isoprene Polymerization Using Fe<sub>12H</sub>/MAO<sup>a</sup>

| Entry | Cat.              | Yield % | Act. <sup>b</sup> | Microstructure(%) <sup>c</sup> |                   |      |
|-------|-------------------|---------|-------------------|--------------------------------|-------------------|------|
|       |                   |         |                   | <i>cis</i> -1,4                | <i>trans</i> -1,4 | 3,4- |
| 1     | Fe <sub>12H</sub> | >99     | 6.8               | 50                             | --                | 50   |

<sup>a</sup> Polymerization conditions: solvent: 5 mL toluene; complex: 10 μmol; isoprene: 20 mmol; time: 2 h; T: 25 °C; MAO/Fe: 500; <sup>b</sup> 10<sup>4</sup> g·mol<sup>-1</sup>·h<sup>-1</sup>; <sup>c</sup> determined by <sup>1</sup>H NMR and <sup>13</sup>C NMR;

## 2. NMR Spectra of the Ligands

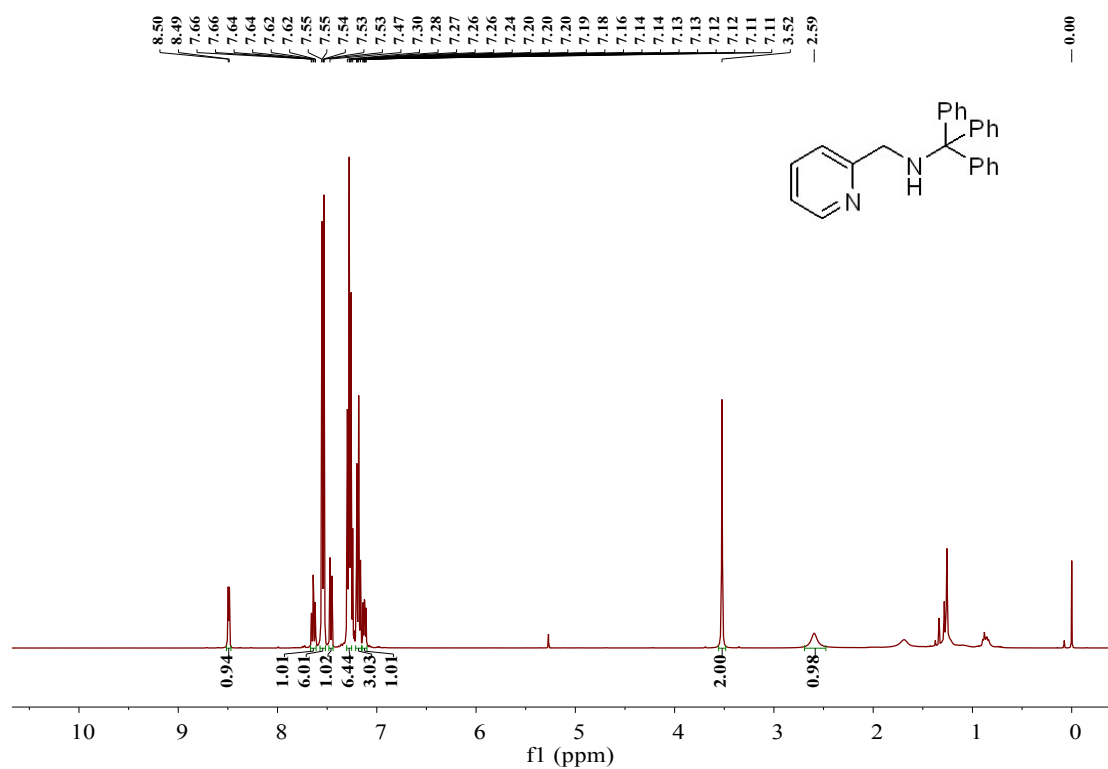

Figure S1.  $^1\text{H}$  NMR spectrum (400 MHz,  $\text{CDCl}_3$ , 298 K) of  $\text{L1}_\text{H}$

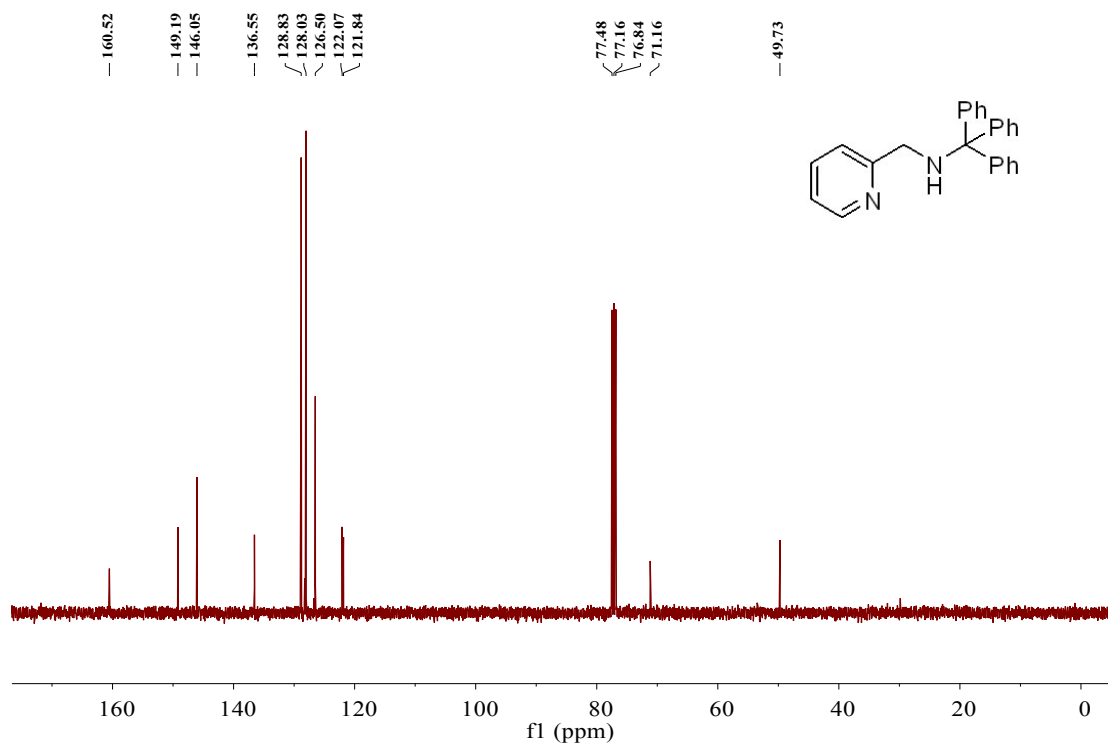

Figure S2.  $^{13}\text{C}$  NMR spectrum (100 MHz,  $\text{CDCl}_3$ , 298 K) of  $\text{L1}_\text{H}$

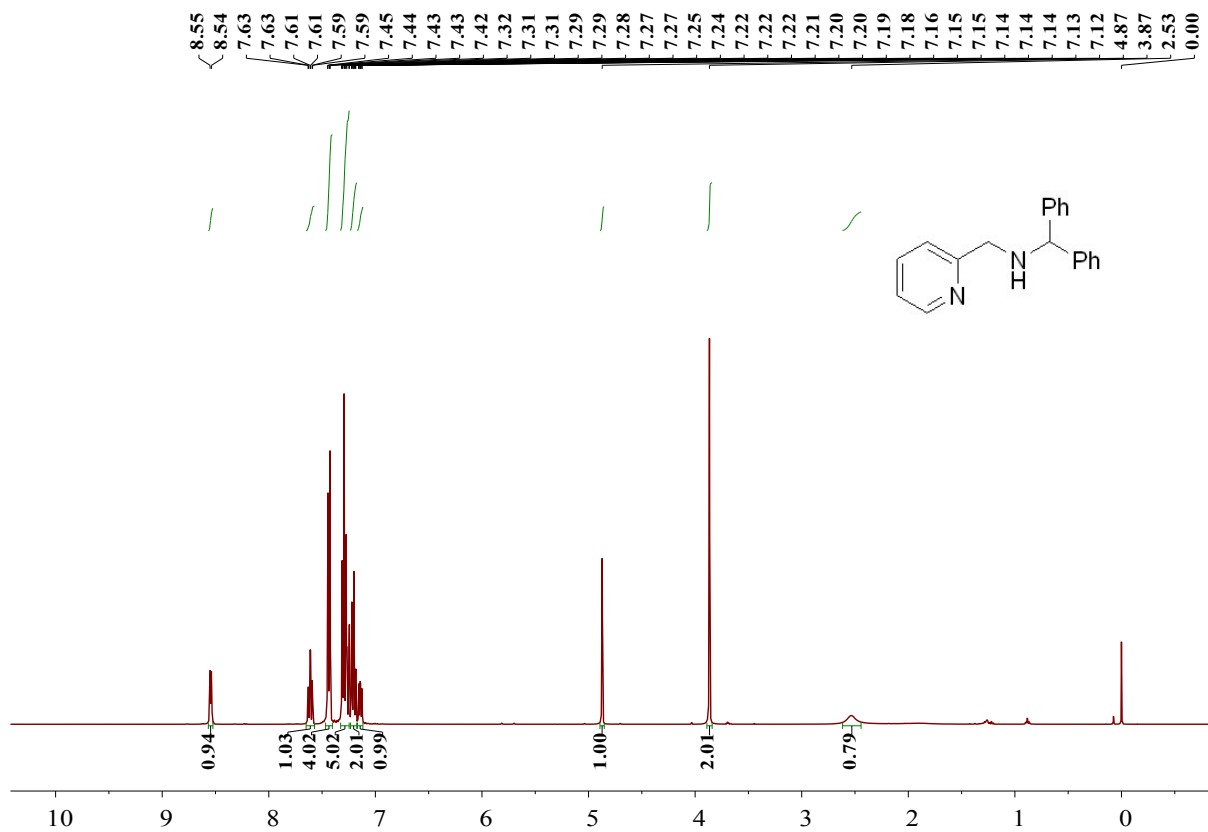

Figure S3.  $^1\text{H}$  NMR spectrum (400 MHz,  $\text{CDCl}_3$ , 298 K) of  $\text{L2}_\text{H}$

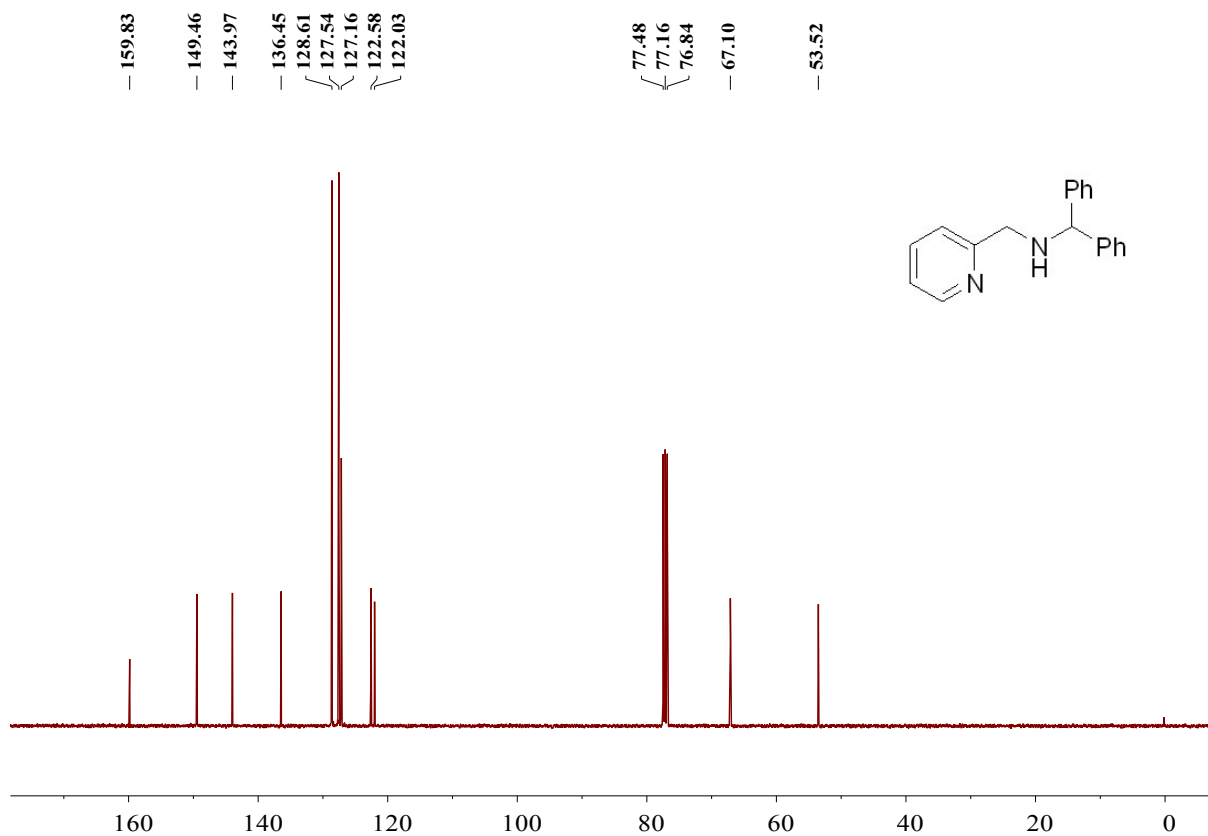

Figure S4.  $^{13}\text{C}$  NMR spectrum (100 MHz,  $\text{CDCl}_3$ , 298 K) of  $\text{L2}_\text{H}$

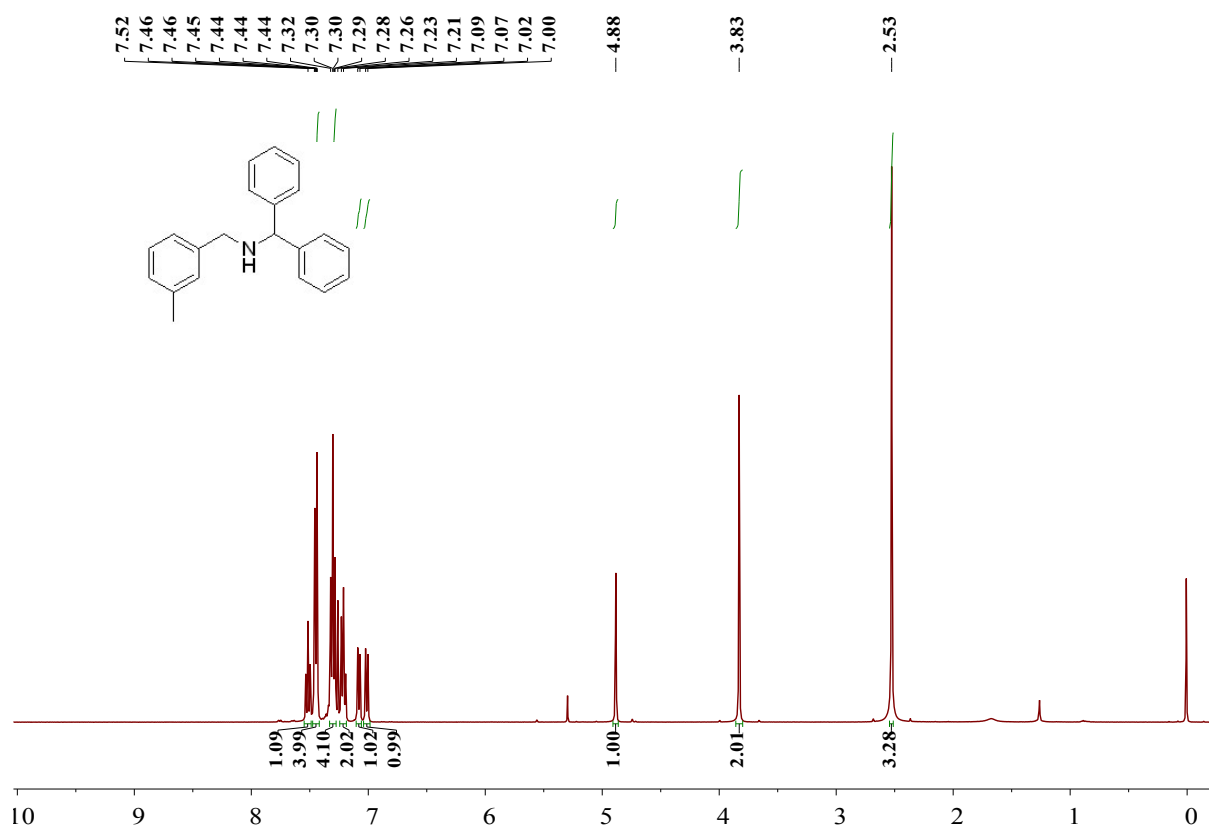

Figure S5. <sup>1</sup>H NMR spectrum (400 MHz, CDCl<sub>3</sub>, 298 K) of L3<sub>Me</sub>

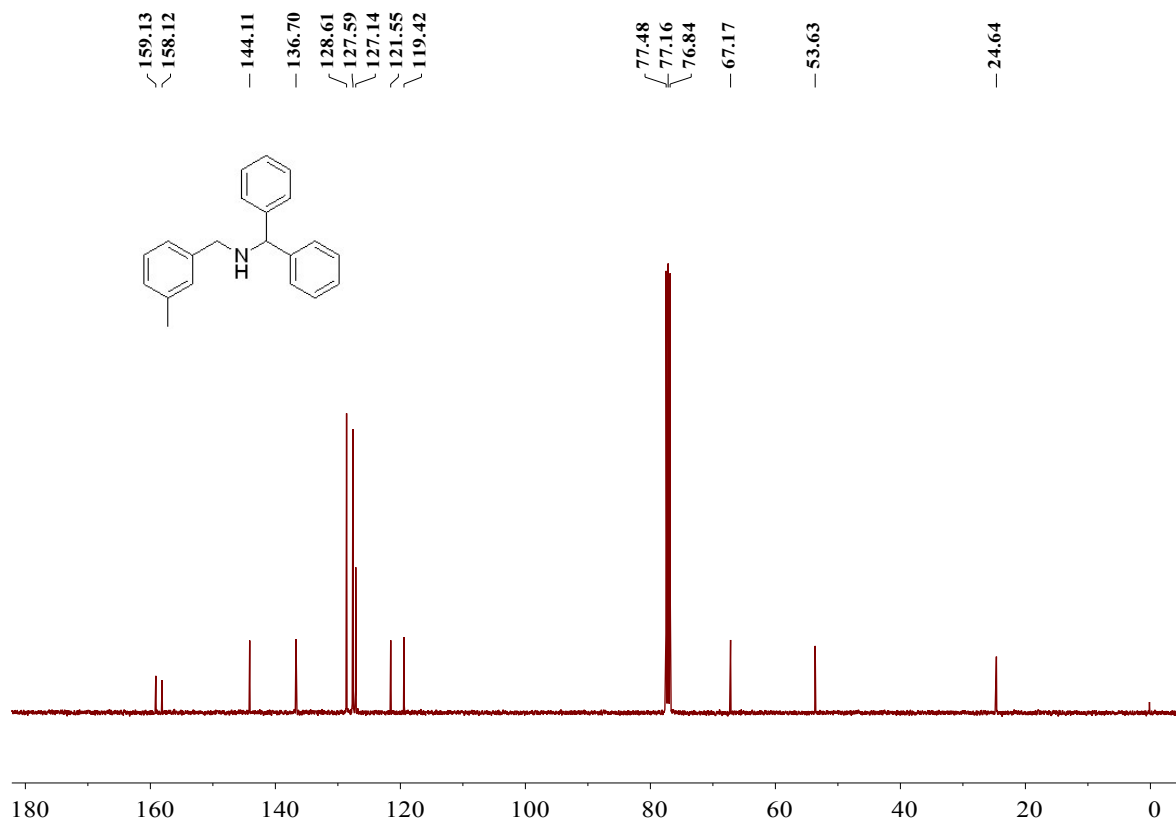

Figure S6. <sup>13</sup>C NMR spectrum (100 MHz, CDCl<sub>3</sub>, 298 K) of L3<sub>Me</sub>

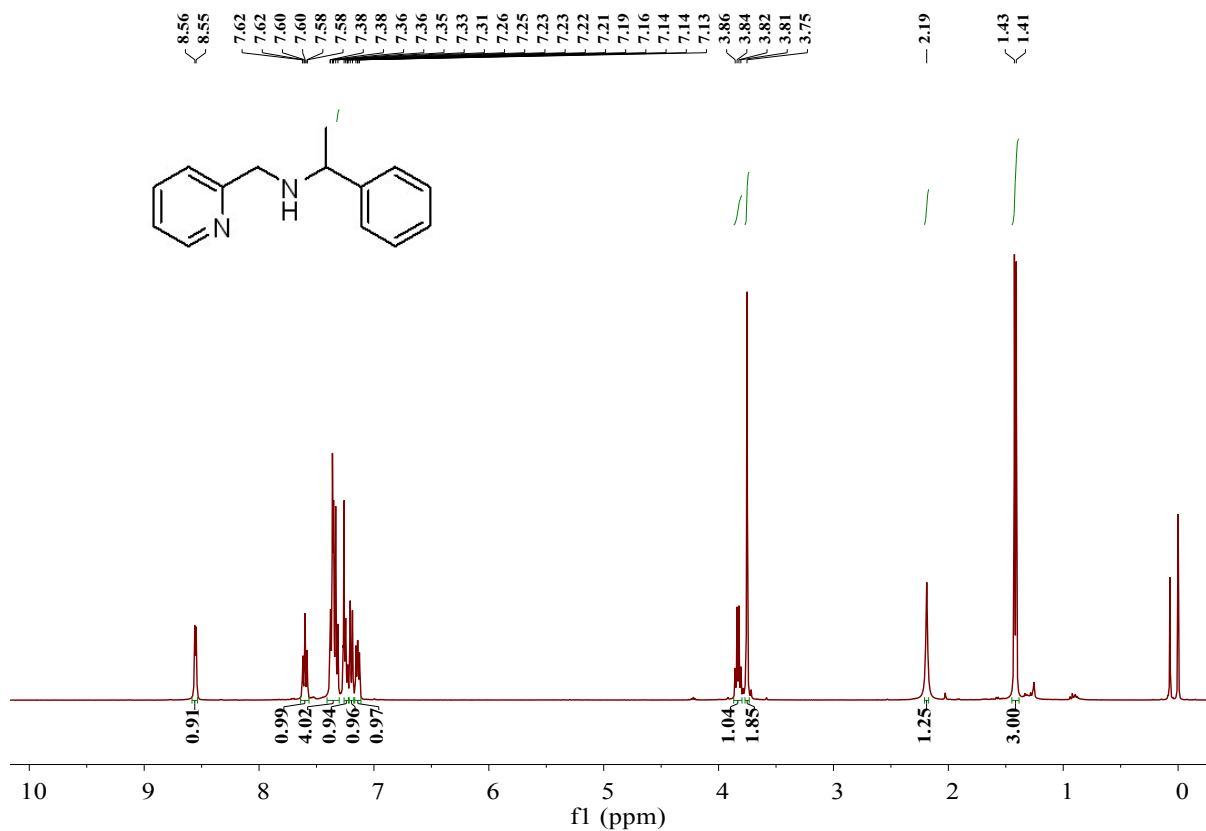

Figure S7. <sup>1</sup>H NMR spectrum (400 MHz, CDCl<sub>3</sub>, 298 K) of L4<sub>H</sub>

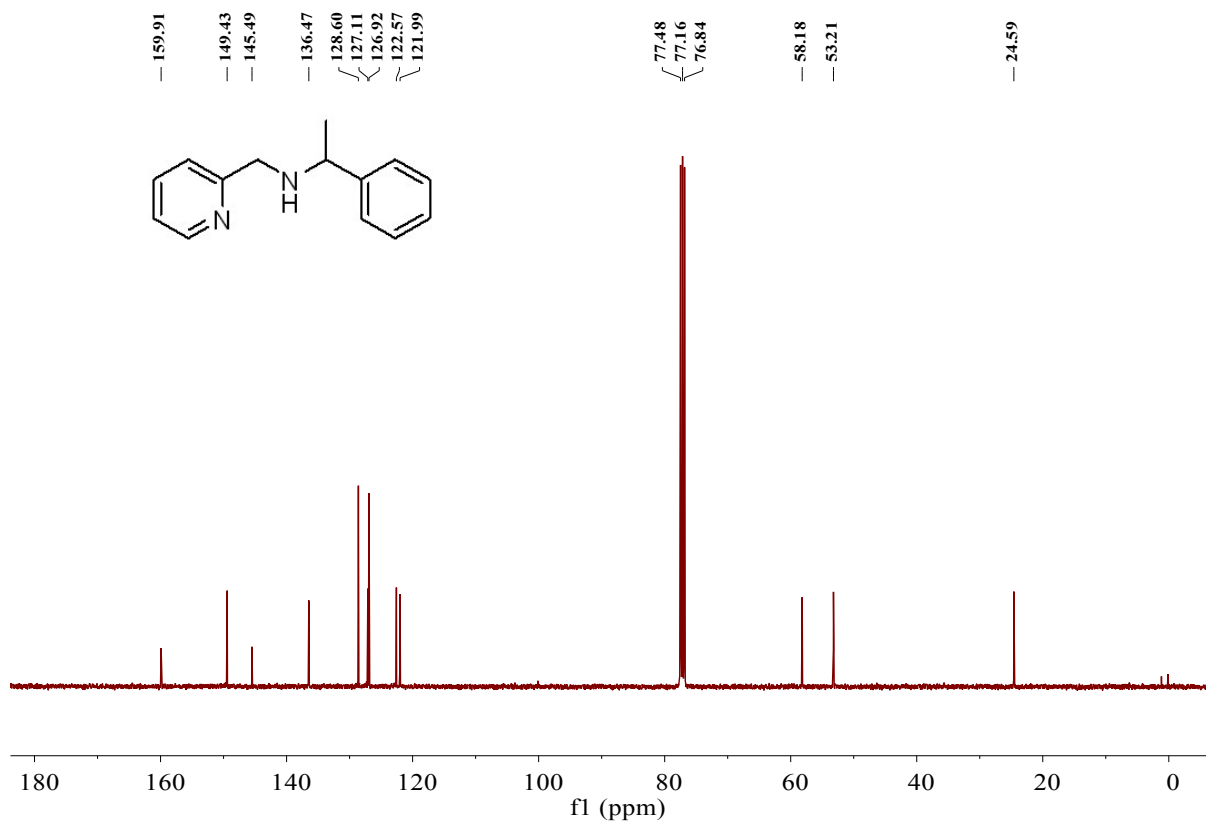

Figure S8. <sup>13</sup>C NMR spectrum (100 MHz, CDCl<sub>3</sub>, 298 K) of L4<sub>H</sub>

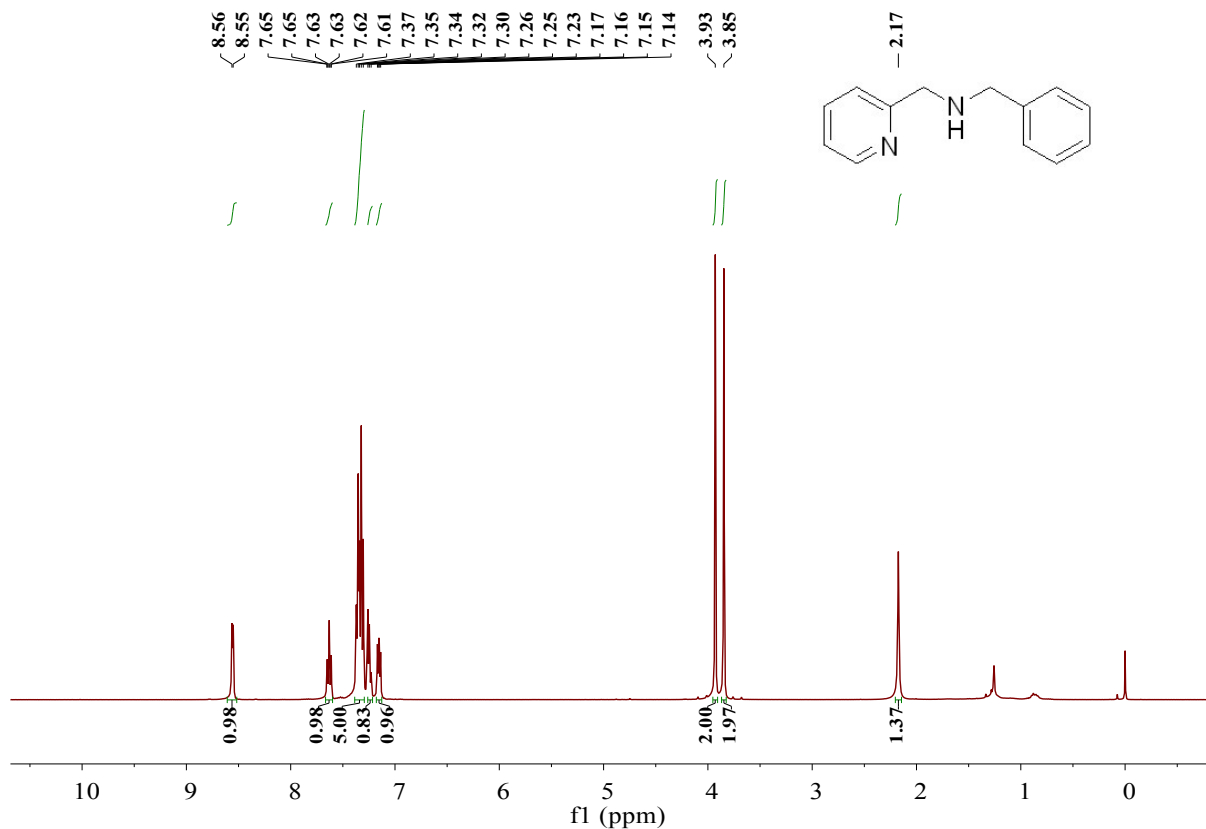

Figure S9. <sup>1</sup>H NMR spectrum (400 MHz, CDCl<sub>3</sub>, 298 K) of L5<sub>H</sub>

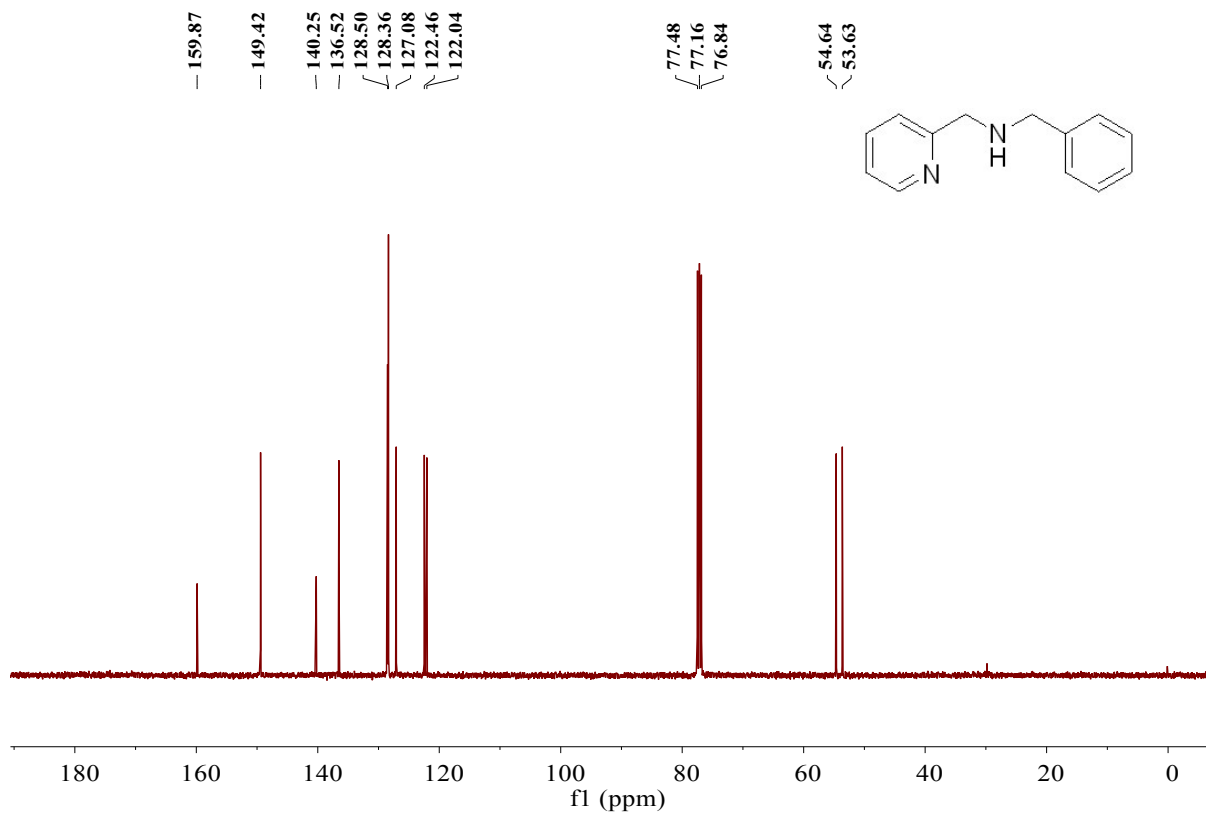

Figure S10. <sup>13</sup>C NMR spectrum (100 MHz, CDCl<sub>3</sub>, 298 K) of L5<sub>H</sub>

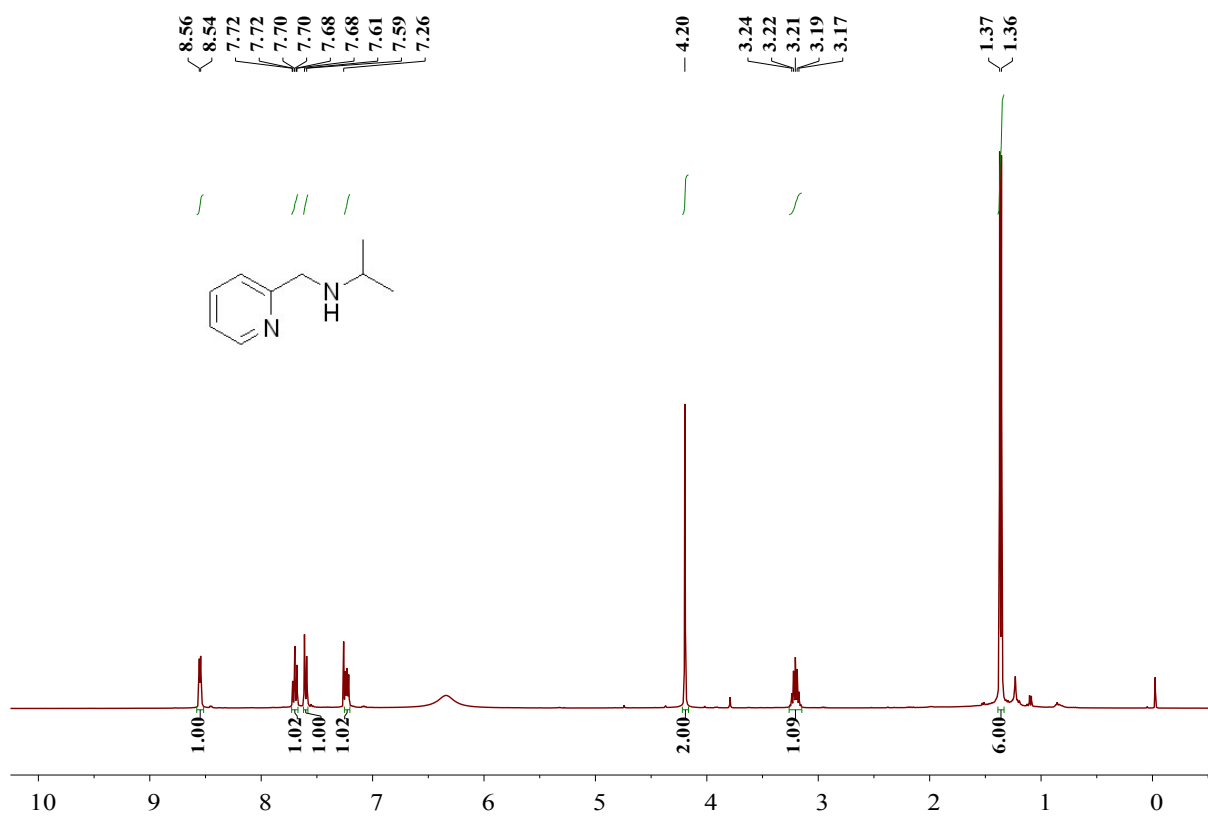

Figure S11. <sup>1</sup>H NMR spectrum (400 MHz, CDCl<sub>3</sub>, 298 K) of L6<sub>H</sub>

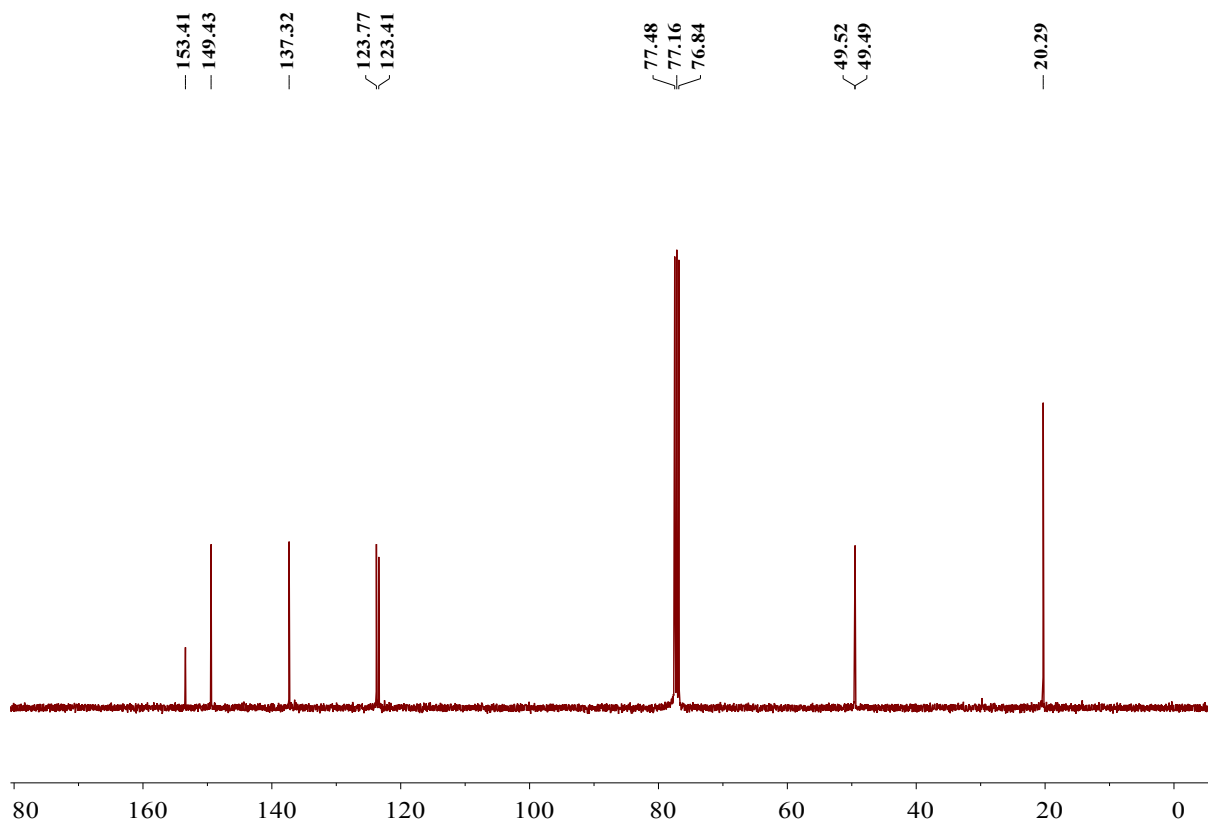

Figure S12. <sup>13</sup>C NMR spectrum (100 MHz, CDCl<sub>3</sub>, 298 K) of L6<sub>H</sub>



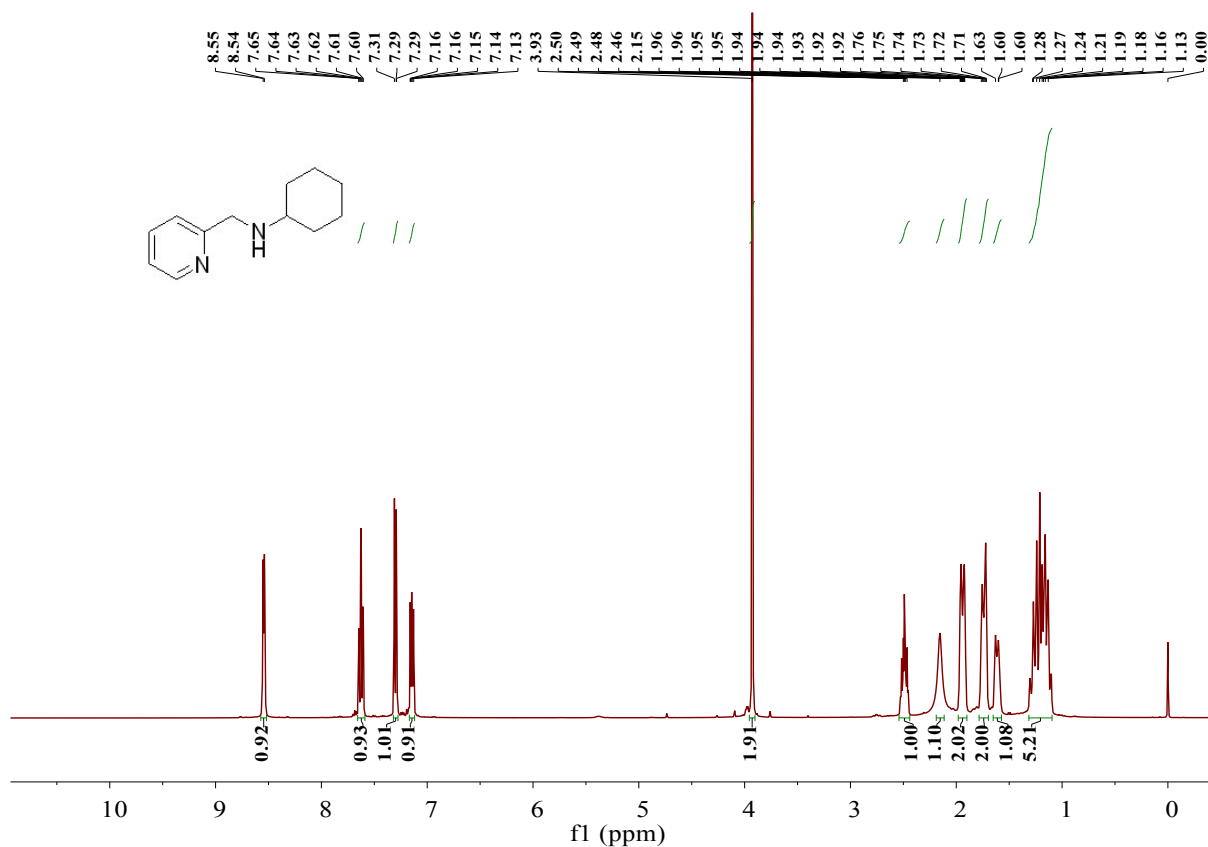

Figure S13.  $^1\text{H}$  NMR spectrum (400 MHz,  $\text{CDCl}_3$ , 298 K) of L7<sub>H</sub>

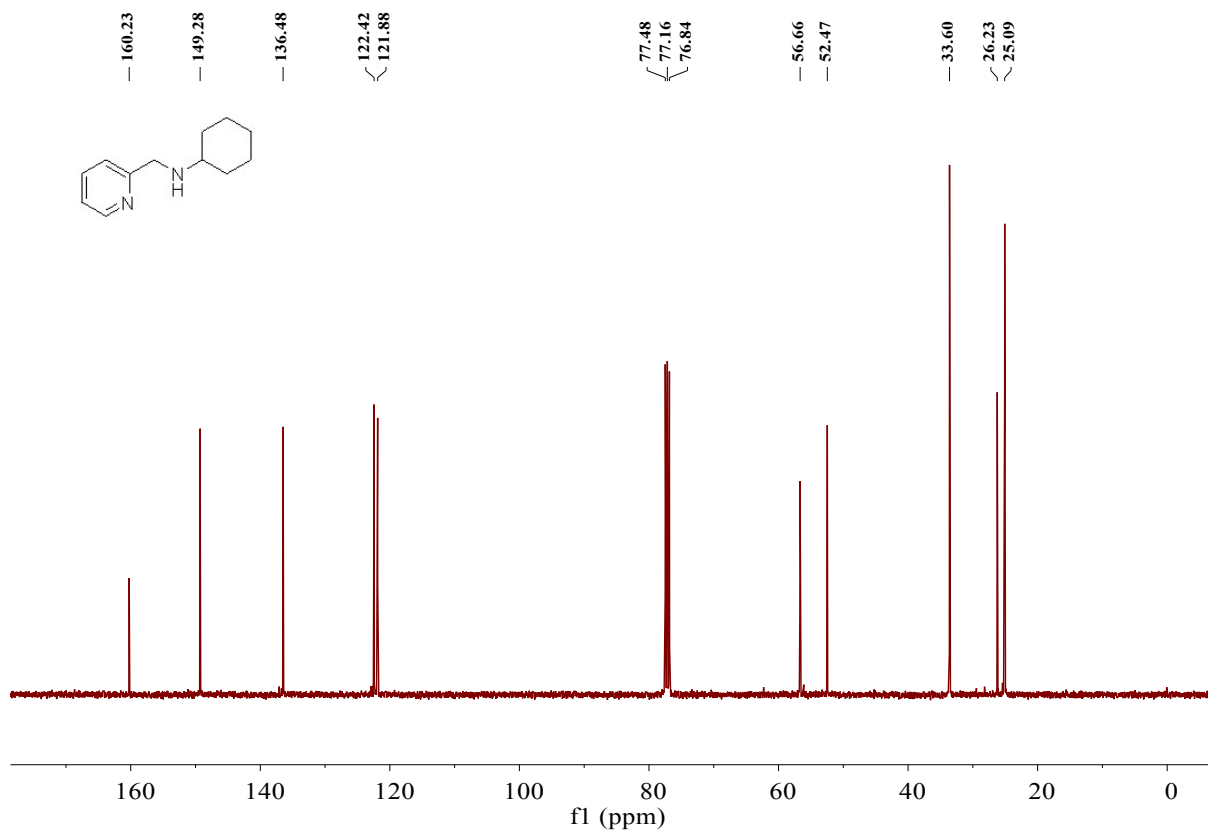

Figure S14.  $^{13}\text{C}$  NMR spectrum (100 MHz,  $\text{CDCl}_3$ , 298 K) of L7<sub>H</sub>

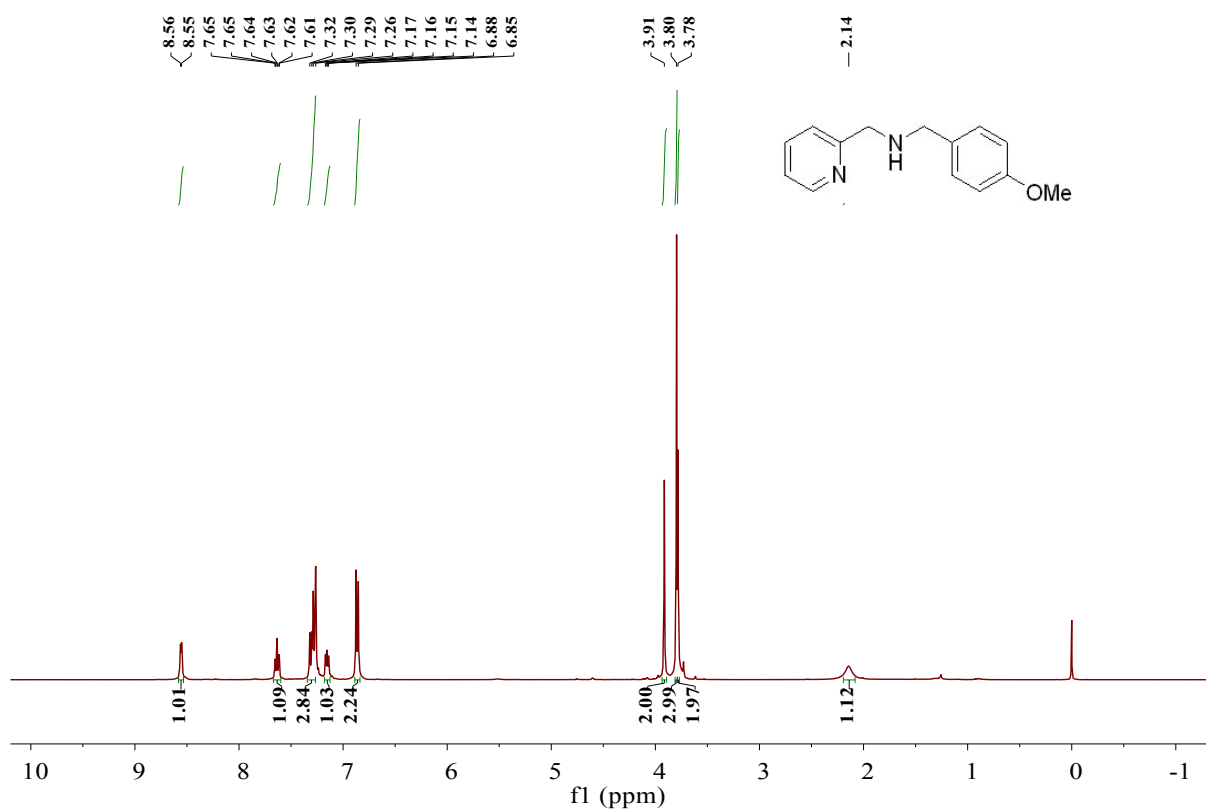

Figure S15.  $^1\text{H}$  NMR spectrum (400 MHz,  $\text{CDCl}_3$ , 298 K) of  $\text{L8}_\text{H}$

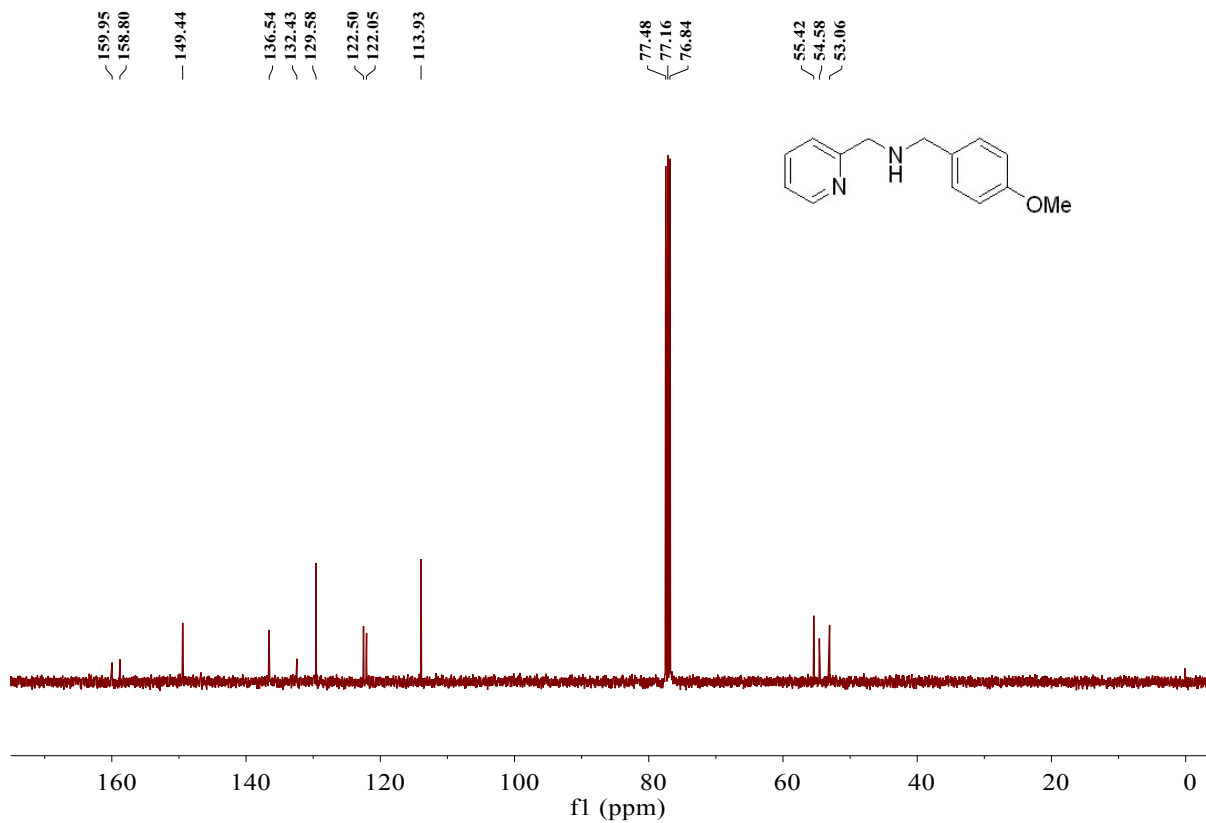

Figure S16.  $^{13}\text{C}$  NMR spectrum (100 MHz,  $\text{CDCl}_3$ , 298 K) of  $\text{L8}_\text{H}$

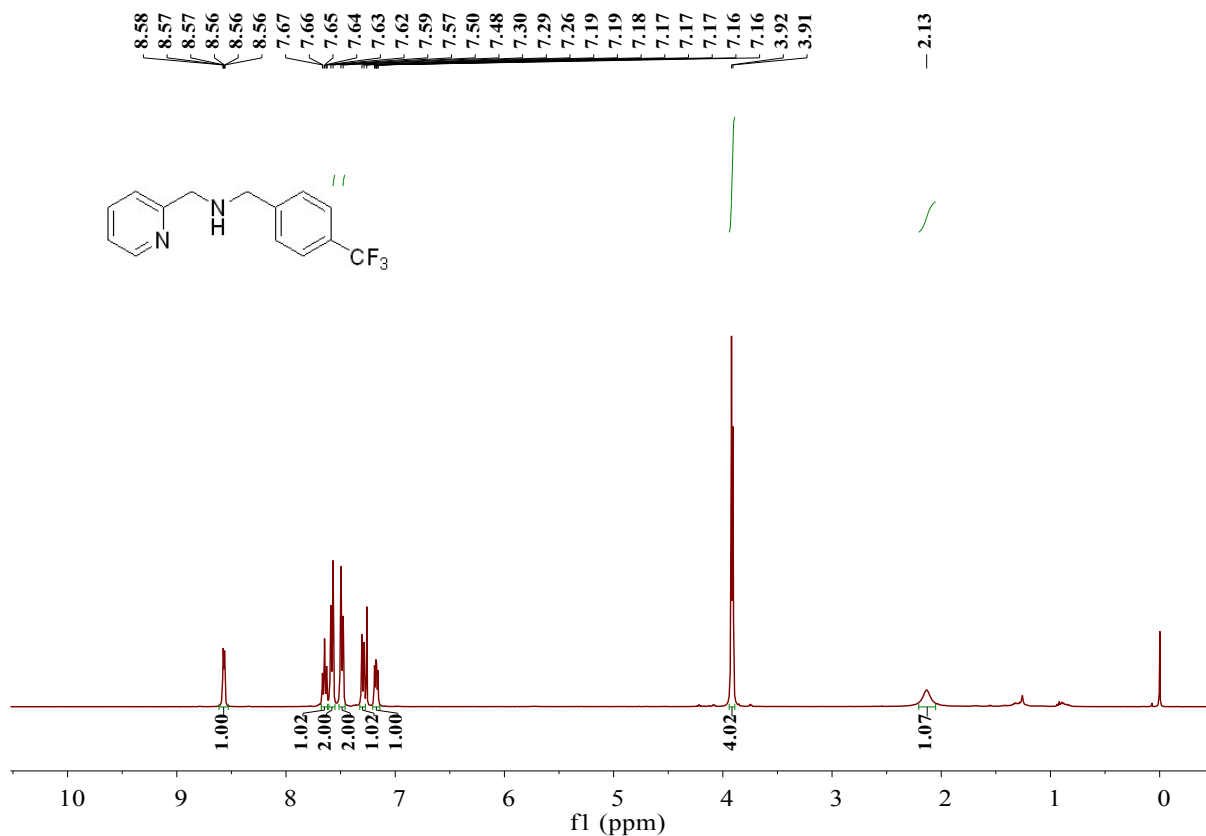

Figure S17. <sup>1</sup>H NMR spectrum (400 MHz, CDCl<sub>3</sub>, 298 K) of L9<sub>H</sub>

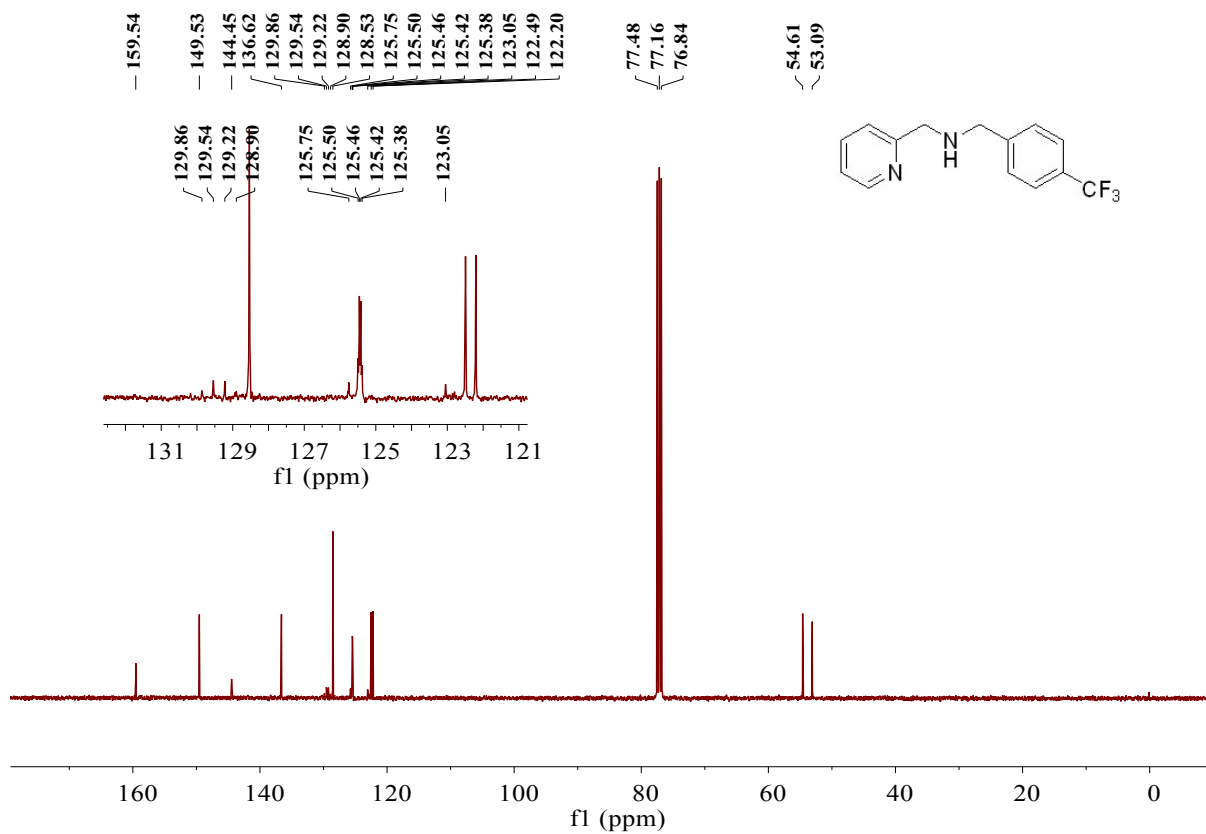

Figure S18. <sup>13</sup>C NMR spectrum (100 MHz, CDCl<sub>3</sub>, 298 K) of L9<sub>H</sub>

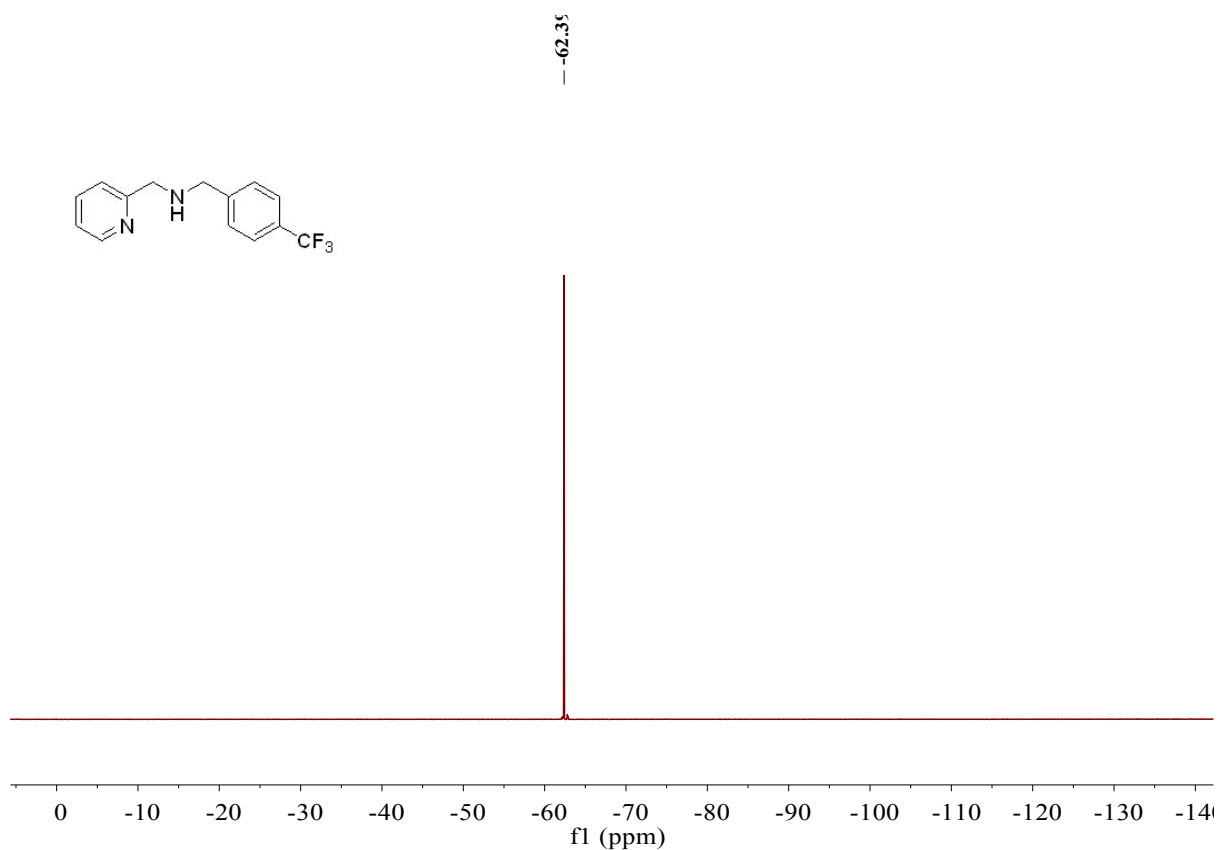

**Figure S19.**  $^{19}\text{F}$  NMR spectrum (376 MHz,  $\text{CDCl}_3$ , 298 K) of  $\text{L9}_\text{H}$

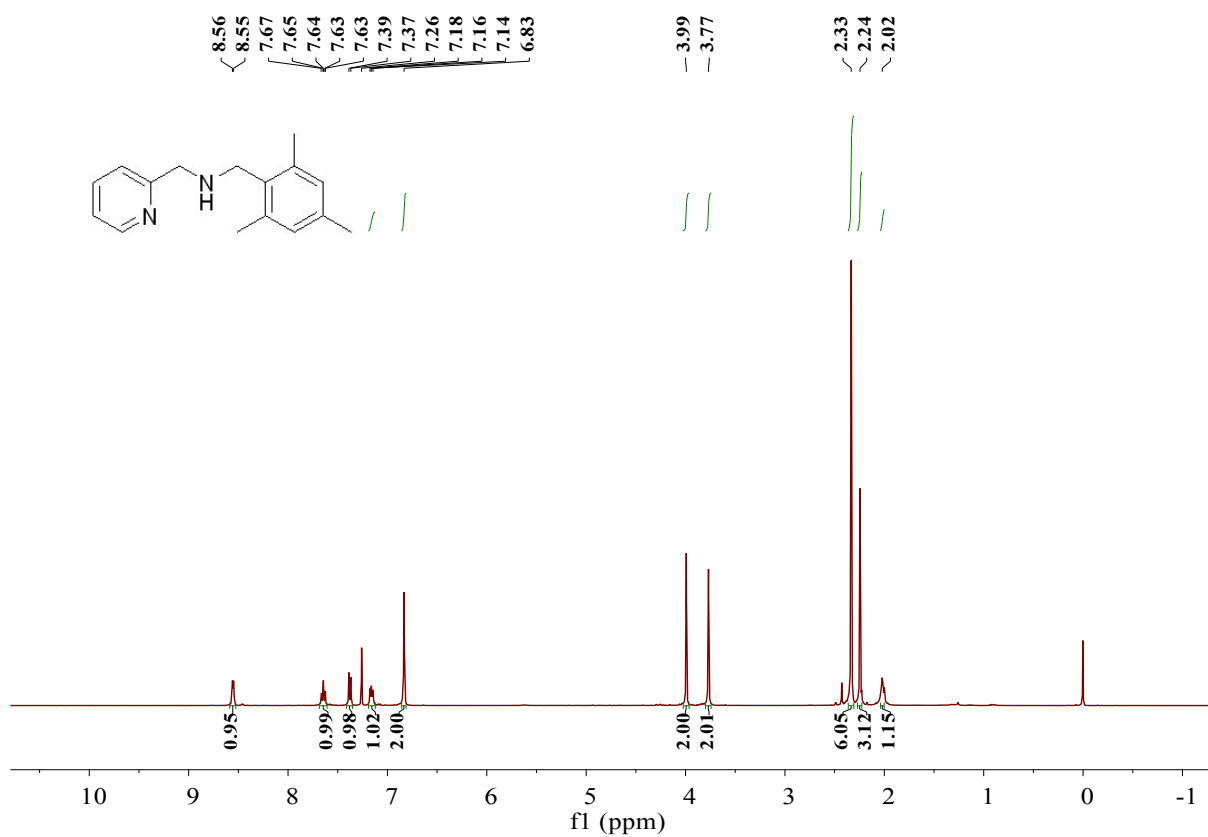

**Figure S20.**  $^1\text{H}$  NMR spectrum (400 MHz,  $\text{CDCl}_3$ , 298 K) of  $\text{L10}_\text{H}$

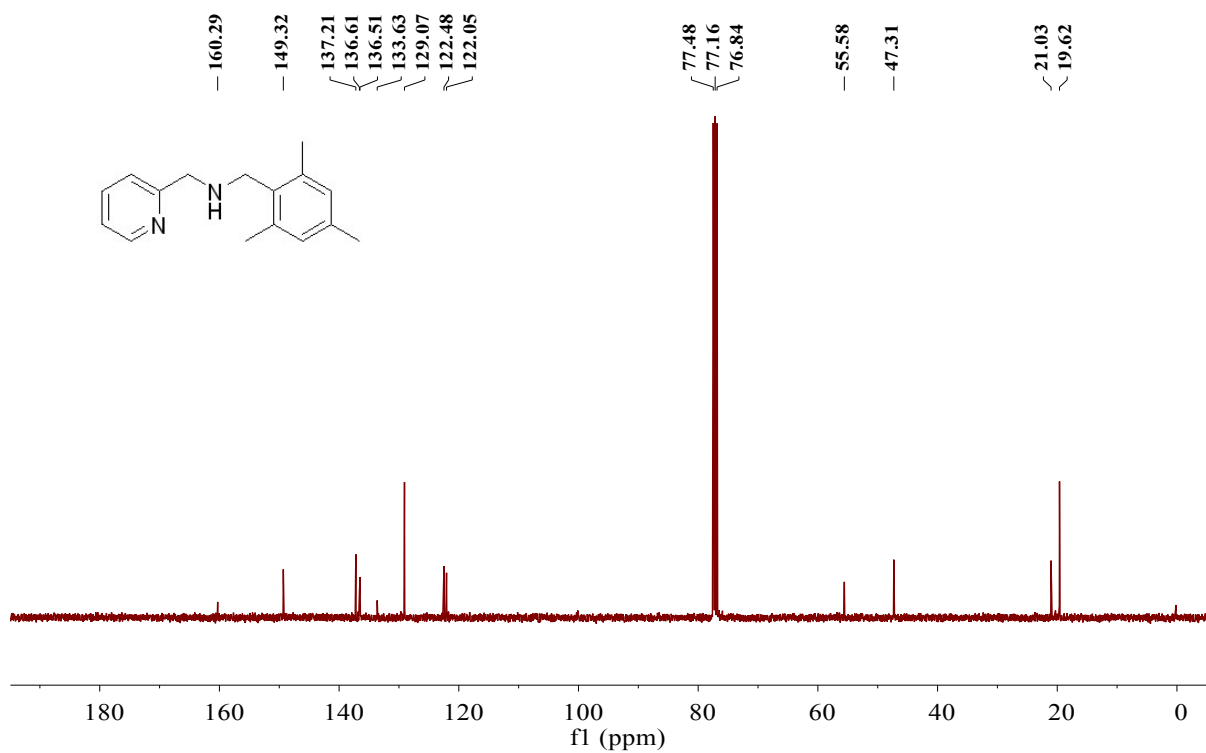

Figure S21.  $^{13}\text{C}$  NMR spectrum (100 MHz,  $\text{CDCl}_3$ , 298 K) of L10<sub>H</sub>

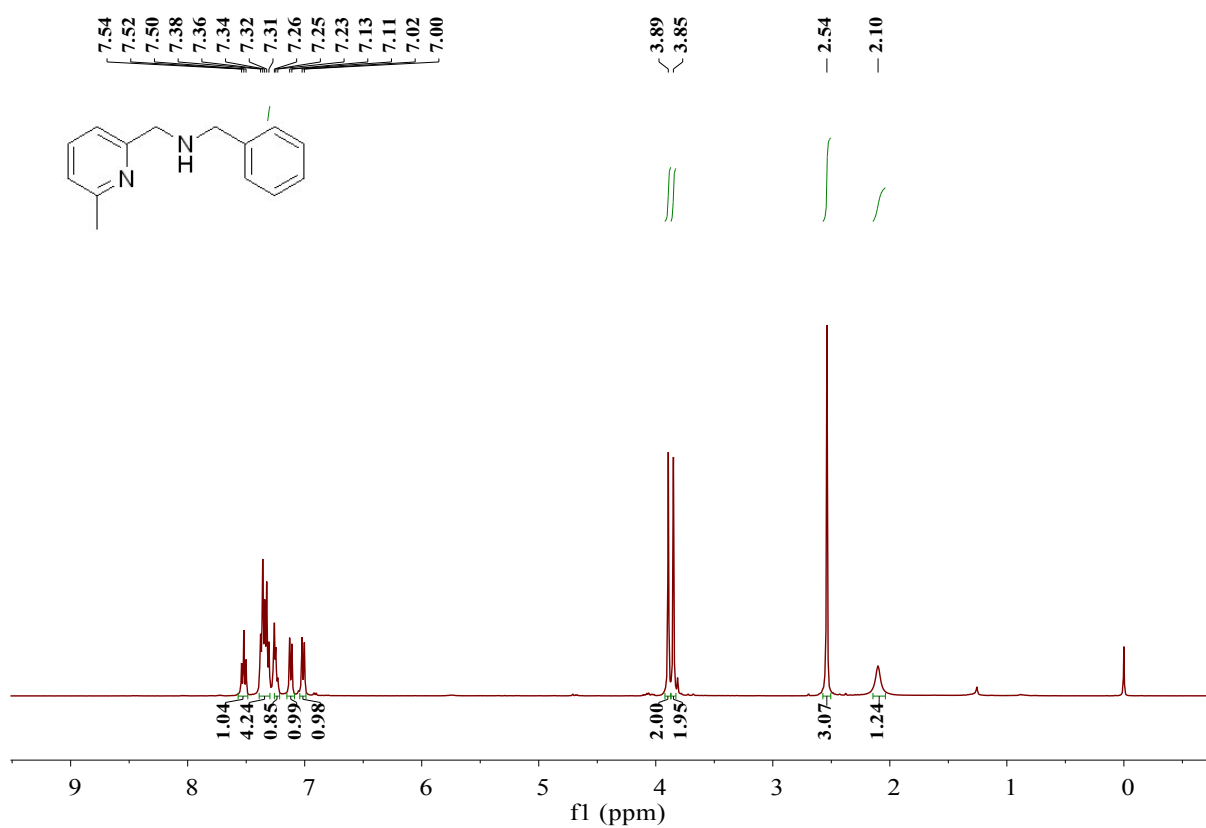

Figure S22.  $^1\text{H}$  NMR spectrum (400 MHz,  $\text{CDCl}_3$ , 298 K) of L11<sub>Me</sub>

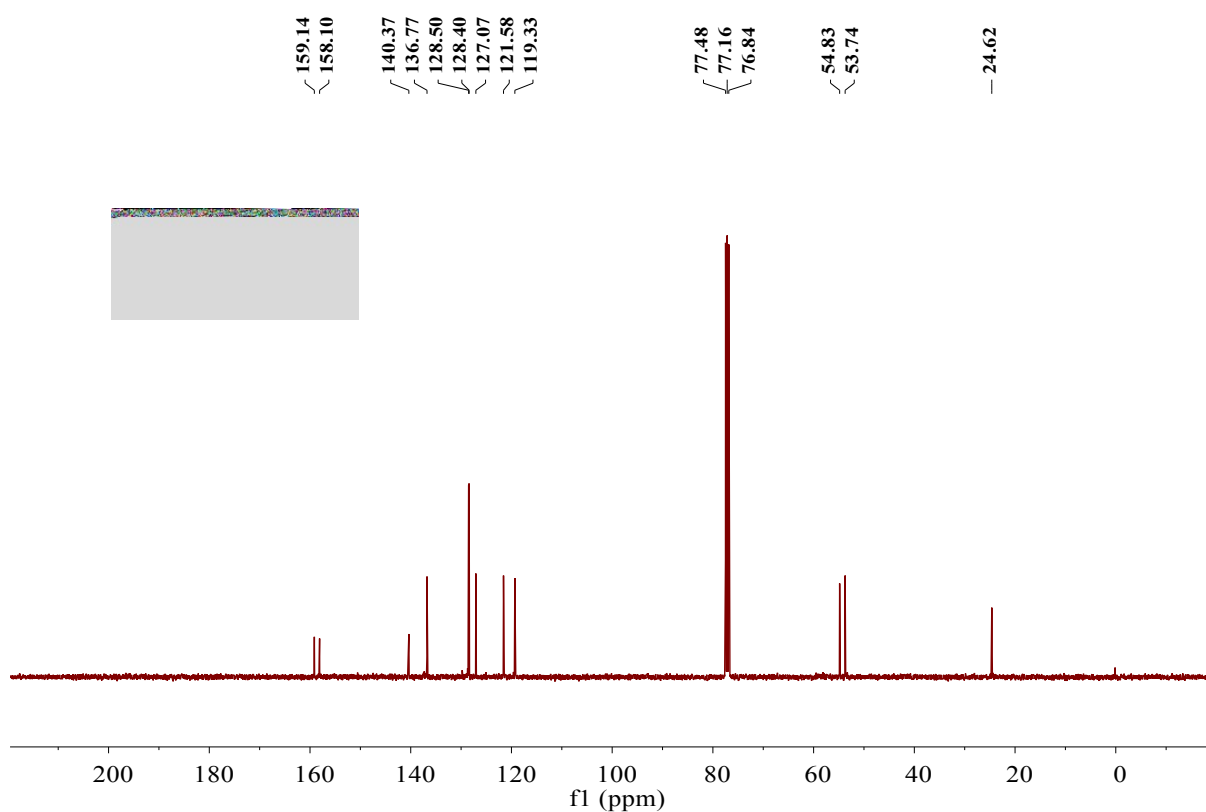

Figure S23.  $^{13}\text{C}$  NMR spectrum (100 MHz,  $\text{CDCl}_3$ , 298 K) of L11<sub>Me</sub>

### 3. NMR Spectra of the Representative Polyisoprene

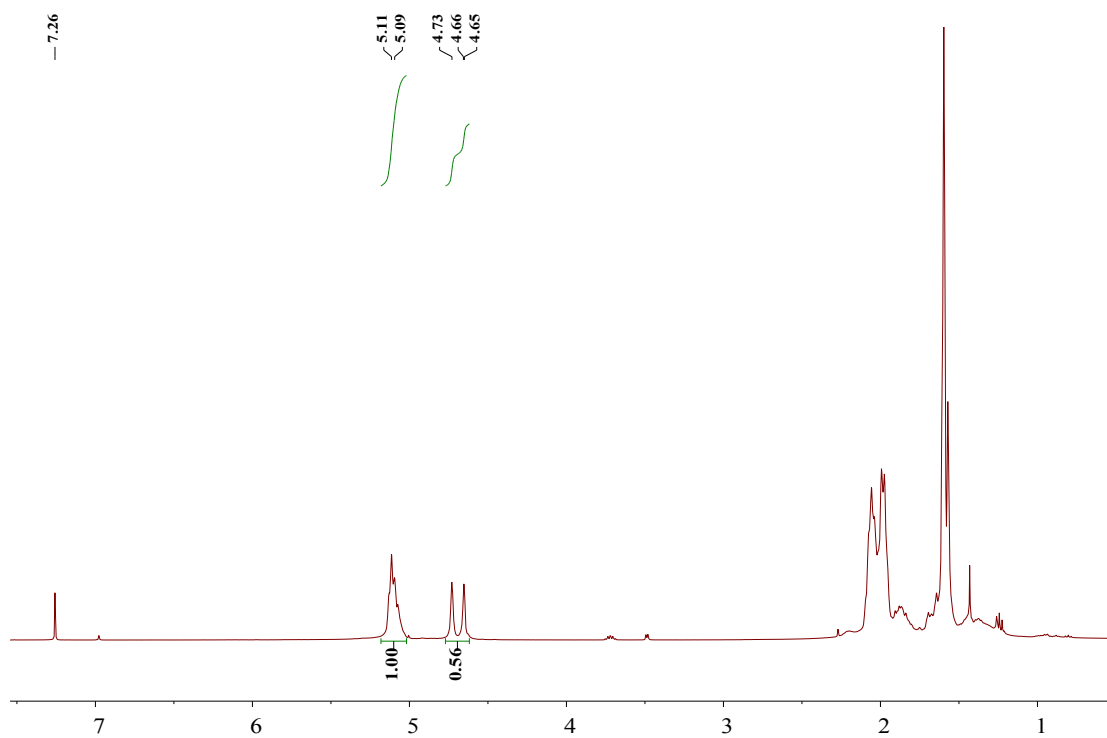

Figure S24.  $^1\text{H}$  NMR spectrum (400 MHz,  $\text{CDCl}_3$ , 298 K) of polyisoprene (Table 2, entry 2).

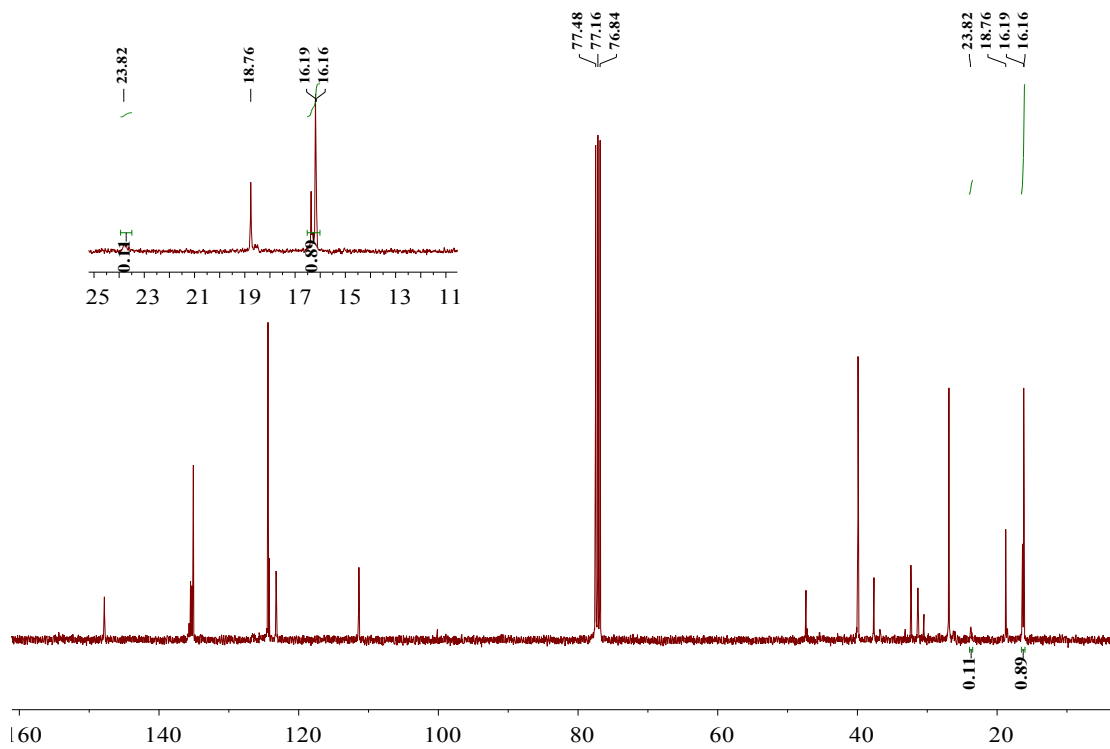

**Figure S25.**  $^{13}\text{C}$  NMR spectrum (100 MHz,  $\text{CDCl}_3$ , 298 K) of polyisoprene (Table 2, entry 2).

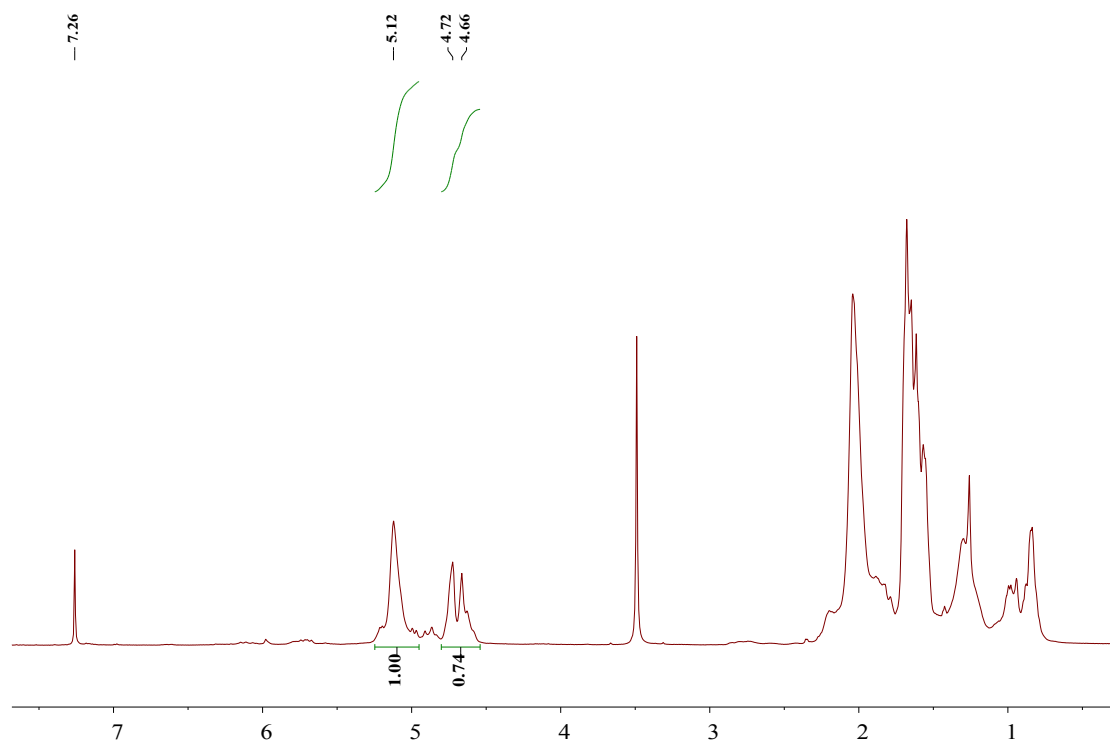

**Figure S26.**  $^1\text{H}$  NMR spectrum (400 MHz,  $\text{CDCl}_3$ , 298 K) of polyisoprene (Table 2, entry 3).

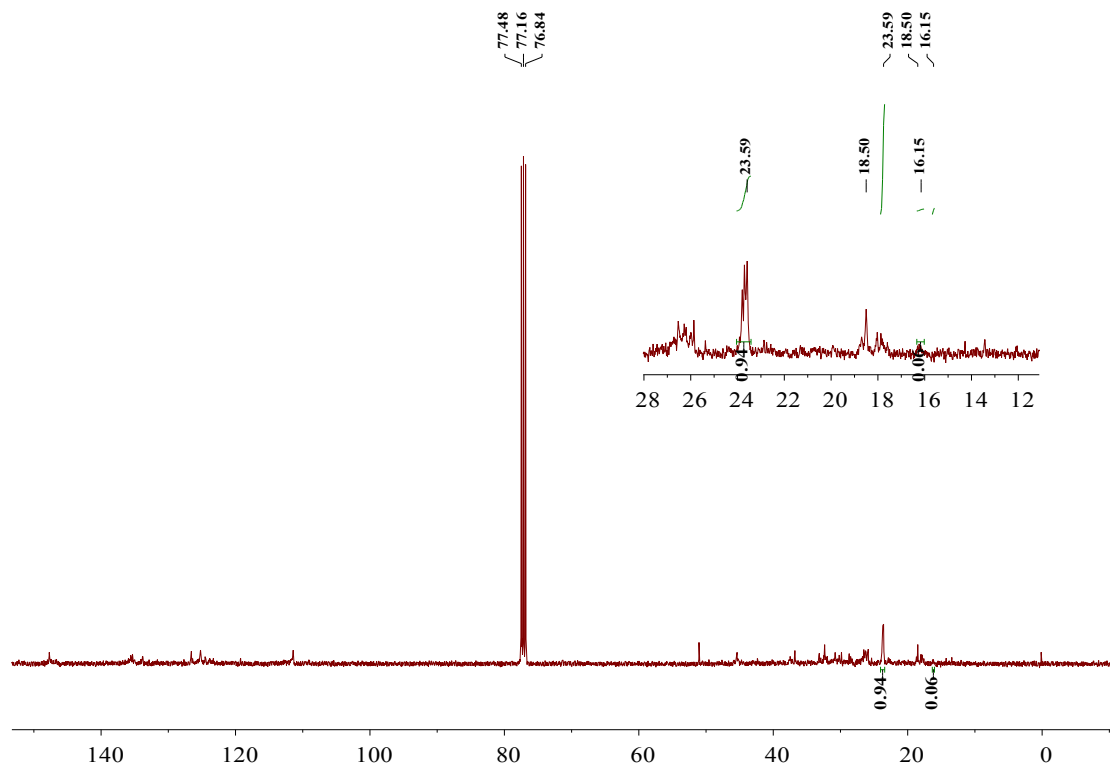

**Figure S27.**  $^{13}\text{C}$  NMR spectrum (100 MHz,  $\text{CDCl}_3$ , 298 K) of polyisoprene (Table 2, entry 3)

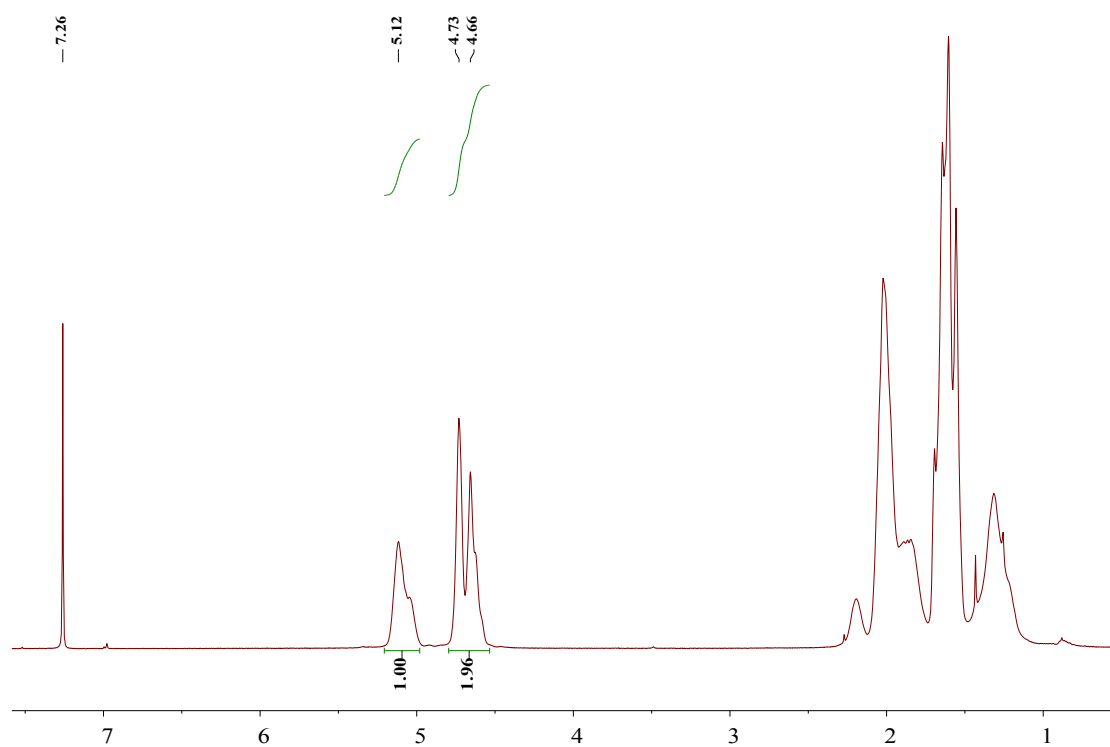

**Figure S28.**  $^1\text{H}$  NMR spectrum (400 MHz,  $\text{CDCl}_3$ , 298 K) of polyisoprene (Table 2, entry 6).



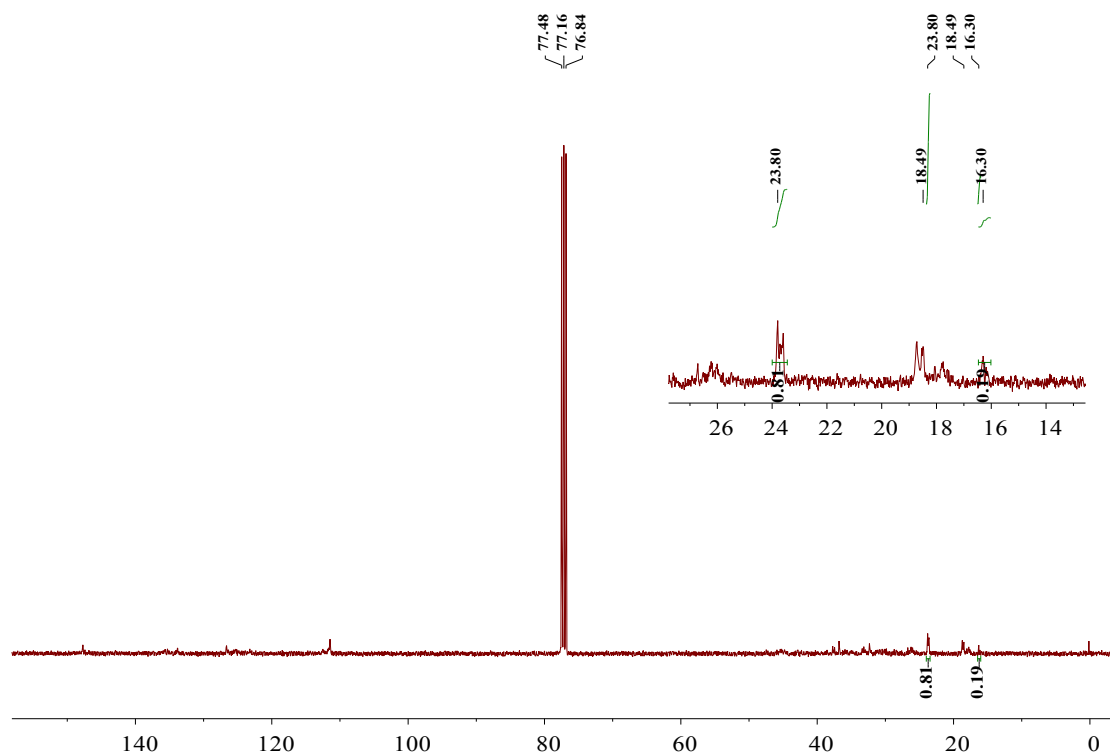

**Figure S29.**  $^{13}\text{C}$  NMR spectrum (100 MHz,  $\text{CDCl}_3$ , 298 K) of polyisoprene (Table 2, entry 6)

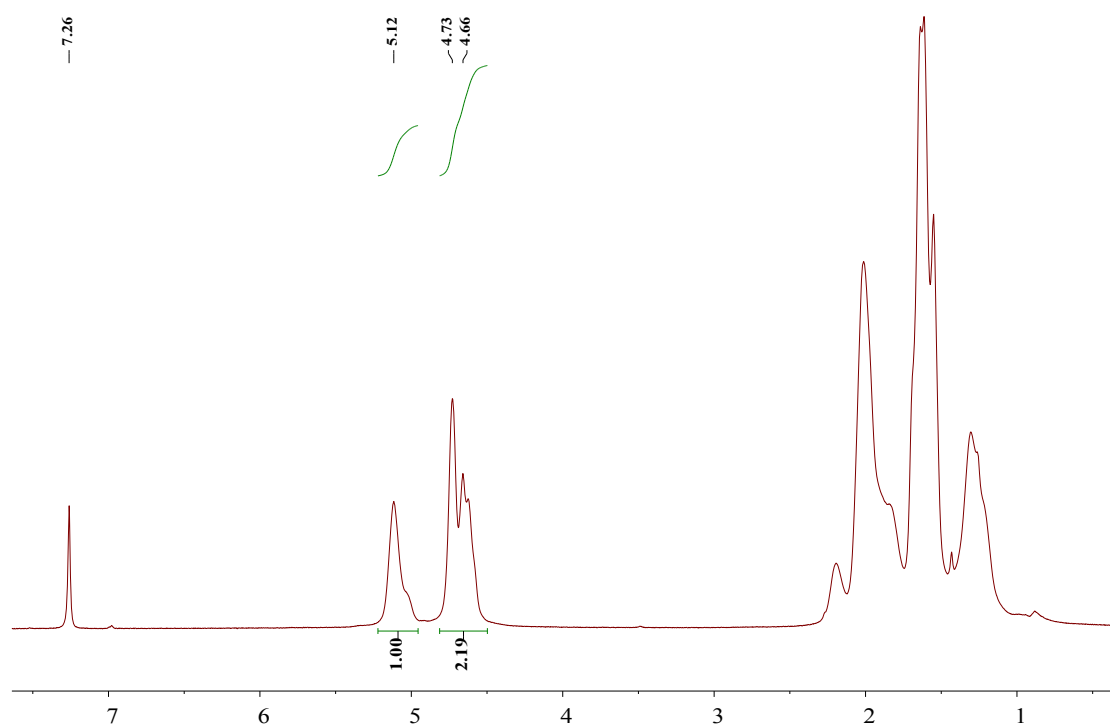

**Figure S30.**  $^1\text{H}$  NMR spectrum (400 MHz,  $\text{CDCl}_3$ , 298 K) of polyisoprene (Table 2, entry 7).

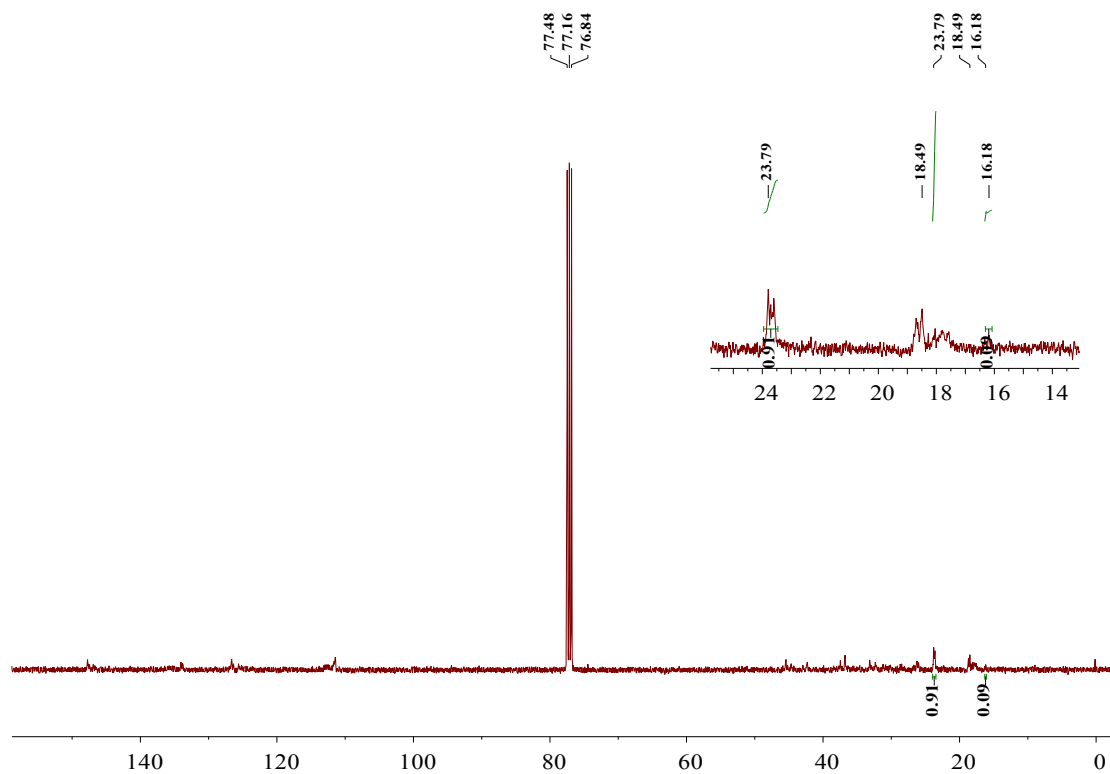

**Figure S31.**  $^{13}\text{C}$  NMR spectrum (100 MHz,  $\text{CDCl}_3$ , 298 K) of polyisoprene (Table 2, entry 7)

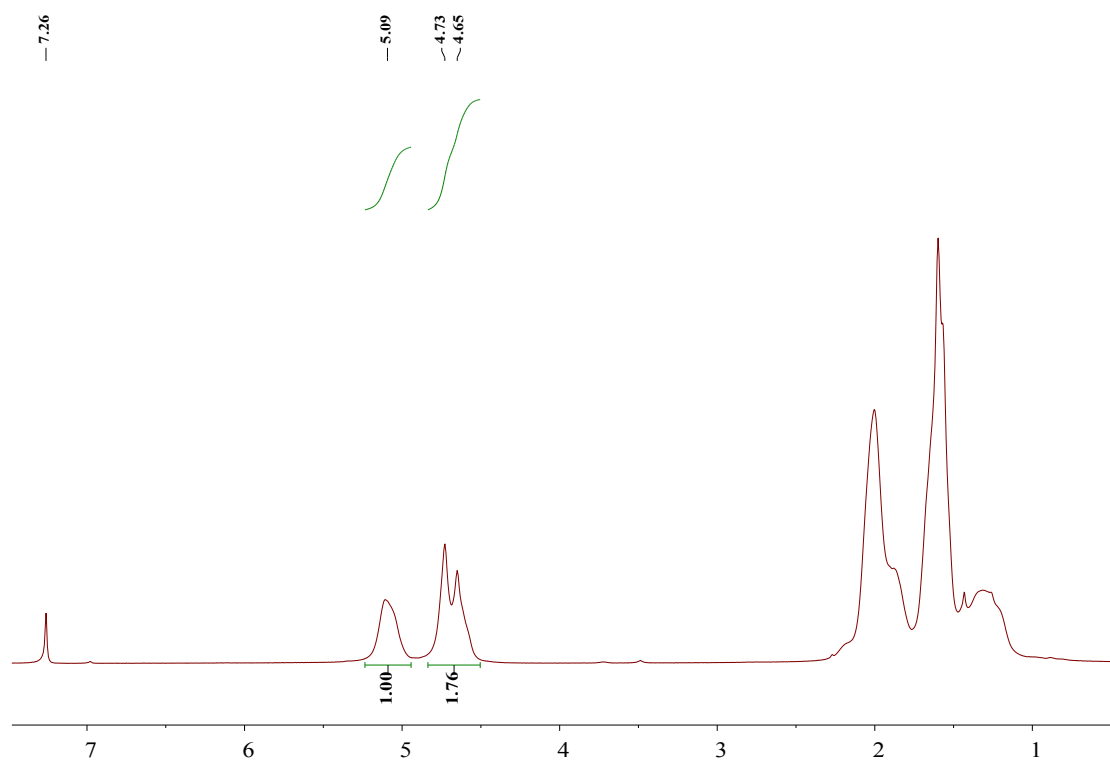

**Figure S32.**  $^1\text{H}$  NMR spectrum (400 MHz,  $\text{CDCl}_3$ , 298 K) of polyisoprene (Table 3, entry 3)

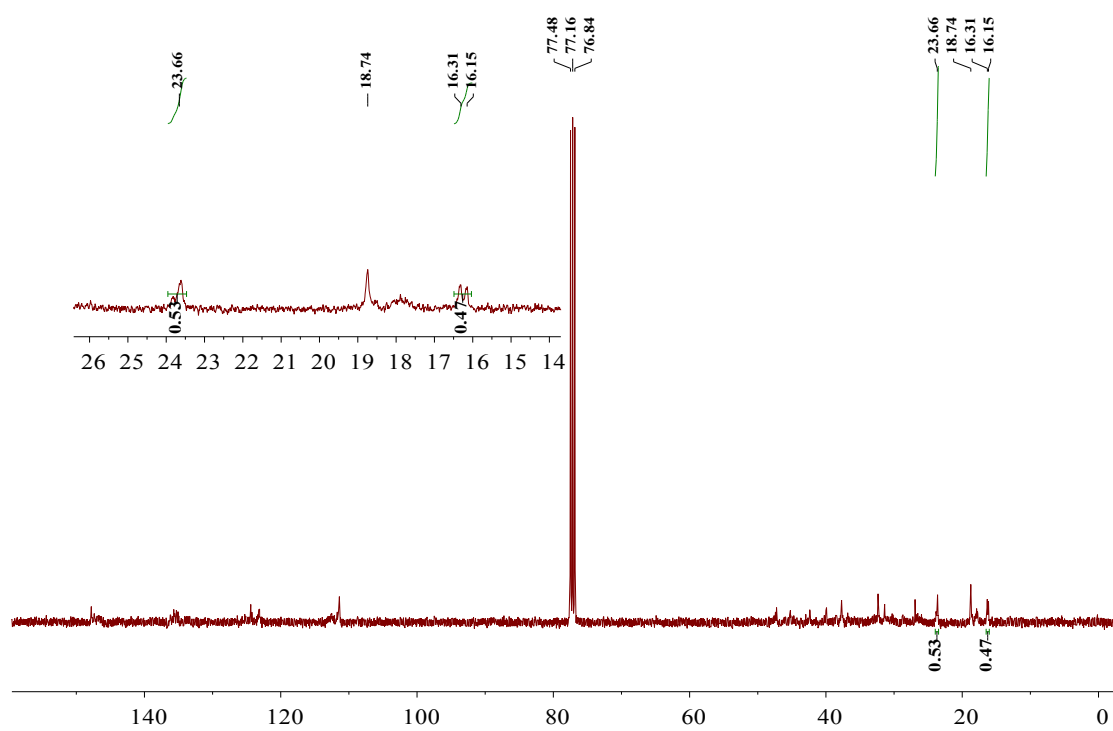

**Figure S33.**  $^{13}\text{C}$  NMR spectrum (100 MHz,  $\text{CDCl}_3$ , 298 K) of polyisoprene (Table 3, entry 3)

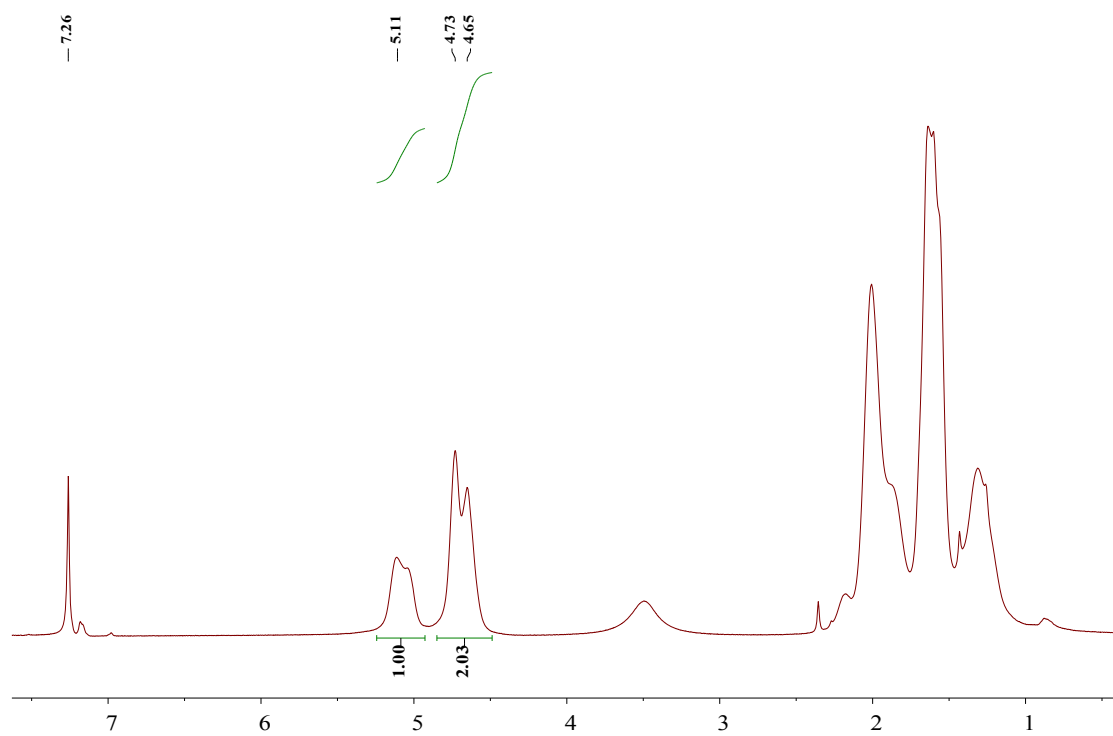

**Figure S34.**  $^1\text{H}$  NMR spectrum (400 MHz,  $\text{CDCl}_3$ , 298 K) of polyisoprene (Table 3, entry 6)

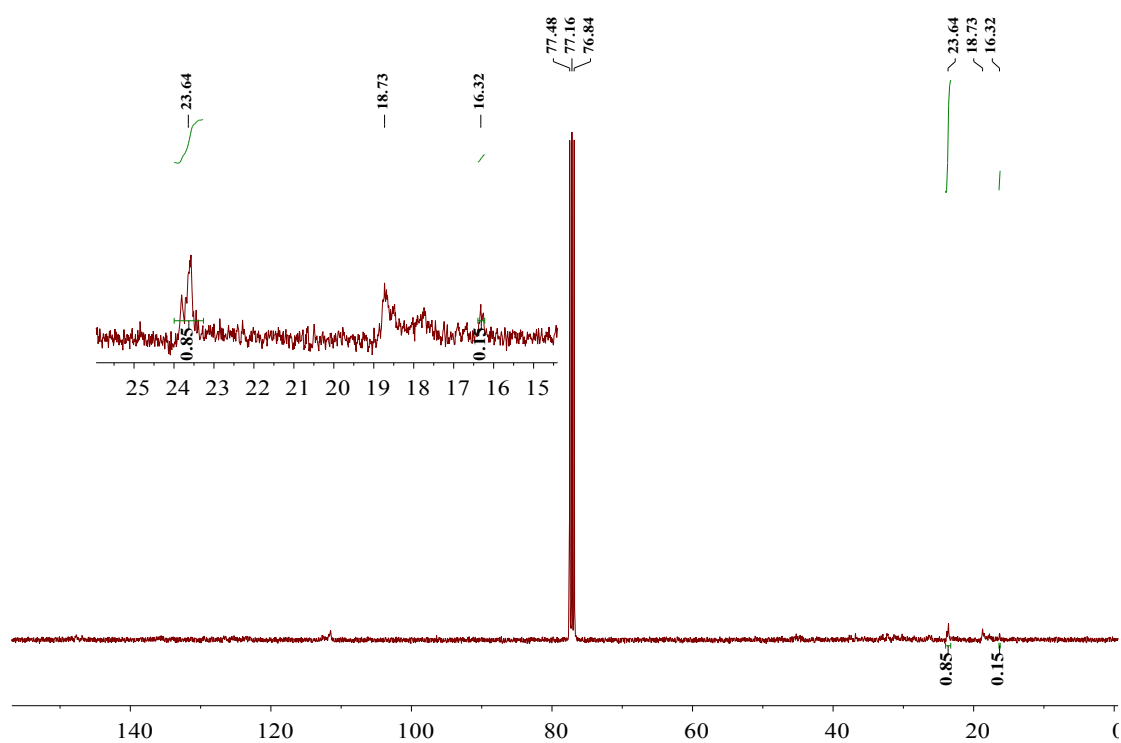

**Figure S35.**  $^{13}\text{C}$  NMR spectrum (100 MHz,  $\text{CDCl}_3$ , 298 K) of polyisoprene (Table 3, entry 6)

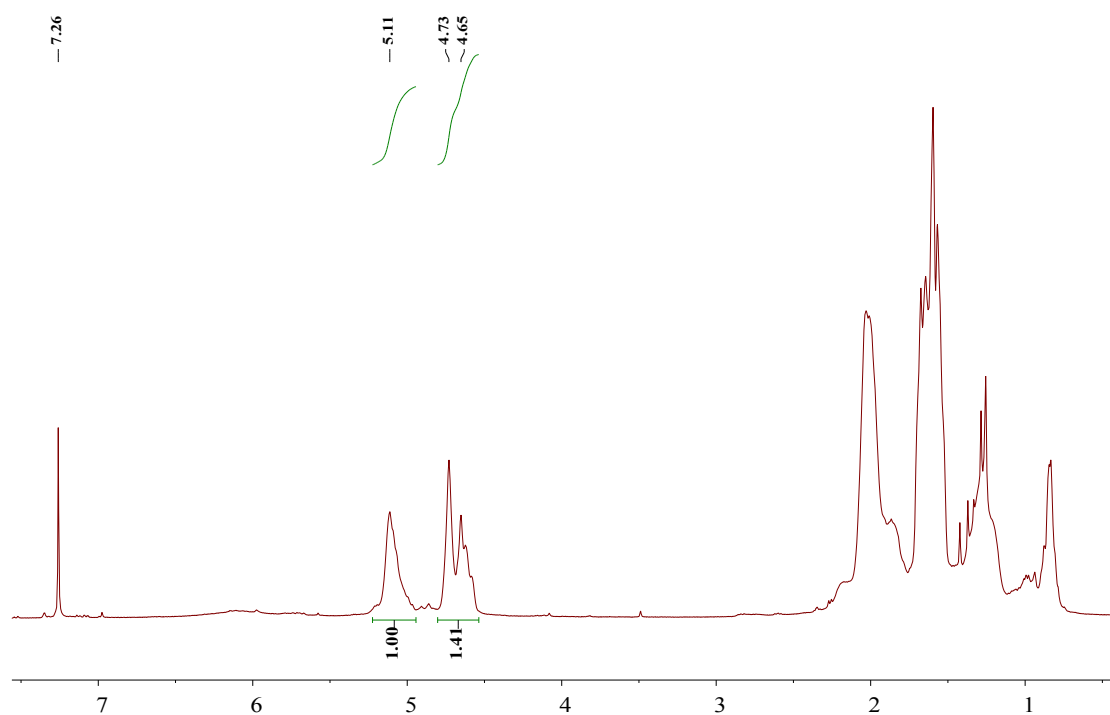

**Figure S36.**  $^1\text{H}$  NMR spectrum (400 MHz,  $\text{CDCl}_3$ , 298 K) of polyisoprene (Table 3, entry 11)

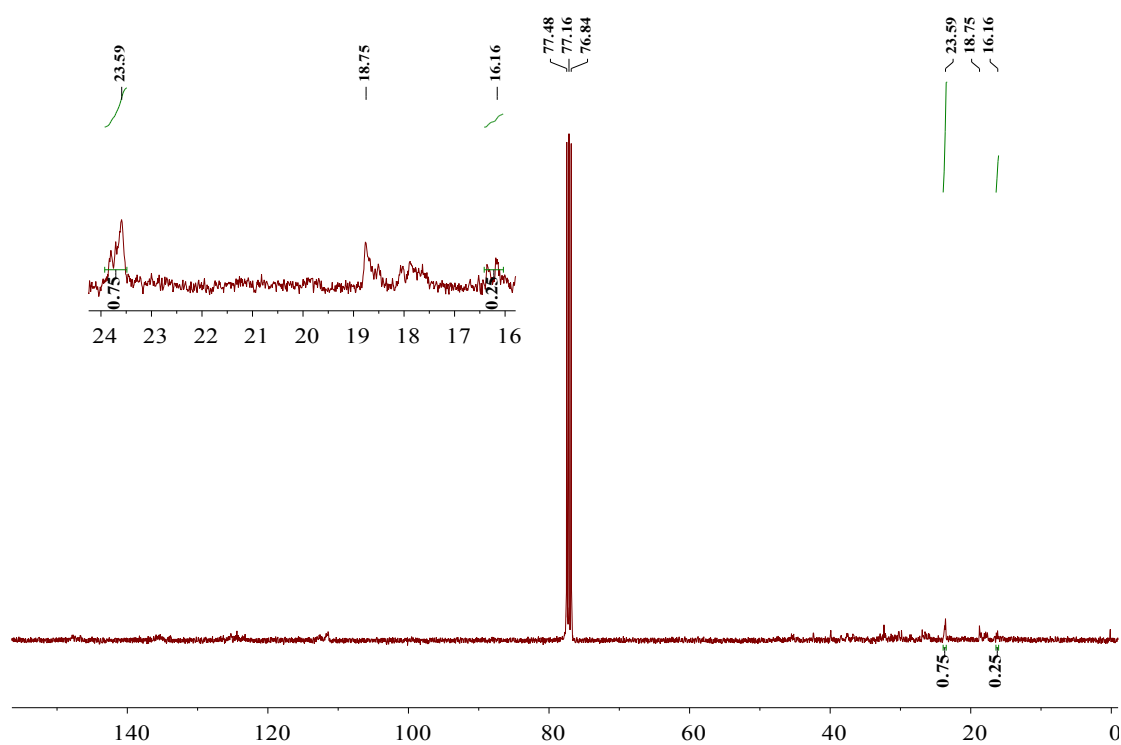

Figure S37.  $^{13}\text{C}$  NMR spectrum (100 MHz,  $\text{CDCl}_3$ , 298 K) of polyisoprene (Table 3, entry 11)

#### 4. GPC Characterization of the Representative Polyisoprene

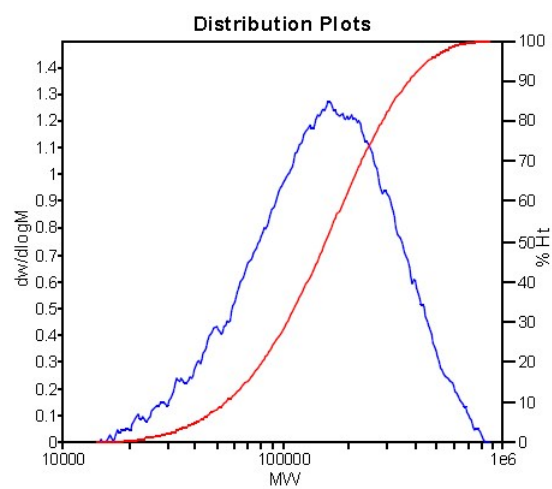

Figure S38. the GPC of Fe(II) complex  $\text{Fe}1_{\text{H}}$  catalyzed polyisoprene (Table 2, entry 1).

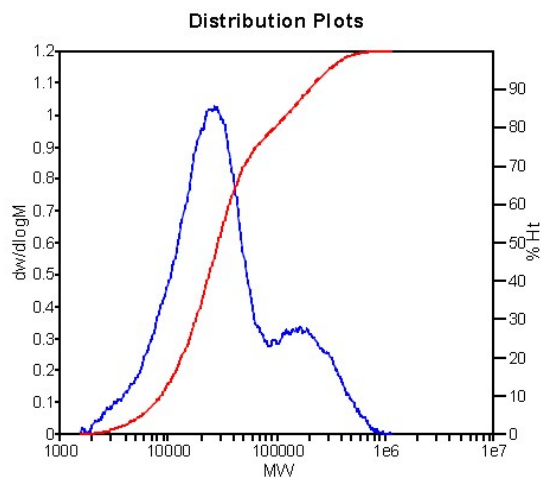

**Figure S39.** the GPC of Fe(II) complex **Fe<sub>2H</sub>** catalyzed polyisoprene (Table 2, entry 2)

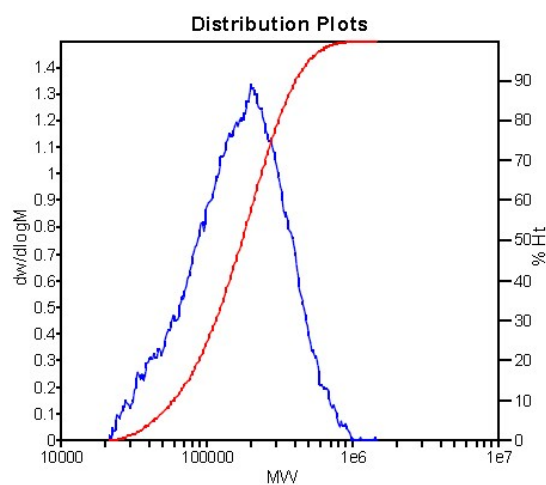

**Figure S40.** the GPC of Fe(II) complex **Fe<sub>3Me</sub>** catalyzed polyisoprene (Table 2, entry 3)

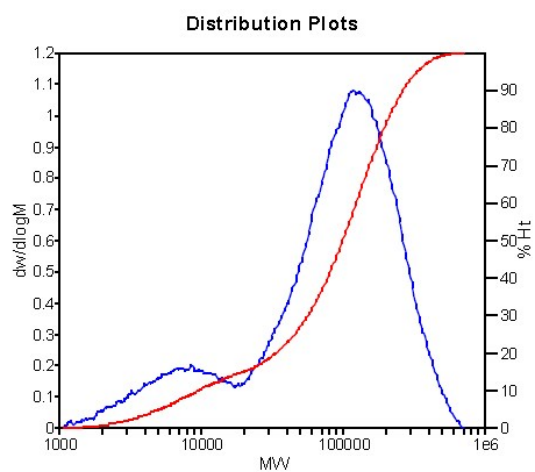

**Figure S41.** the GPC of Fe(II) complex **Fe<sub>4H</sub>** catalyzed polyisoprene (Table 2, entry 4)

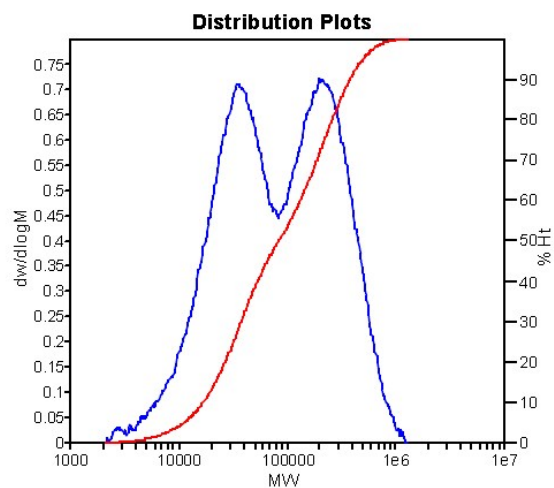

Figure S42. the GPC of Fe(II) complex **Fe5<sub>H</sub>** catalyzed polyisoprene (Table 2, entry 5)

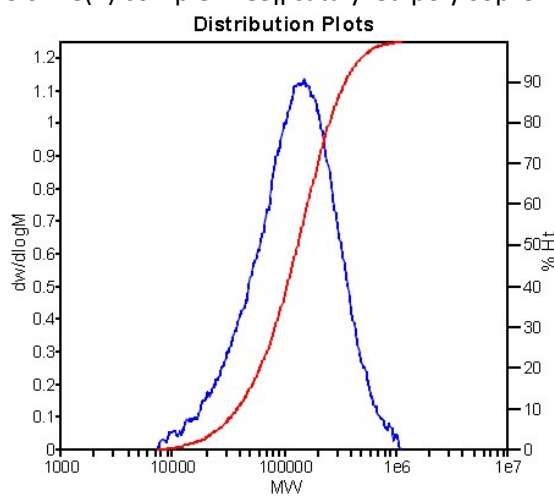

Figure S43. the GPC of Fe(II) complex **Fe6<sub>H</sub>** catalyzed polyisoprene (Table 2, entry 6)

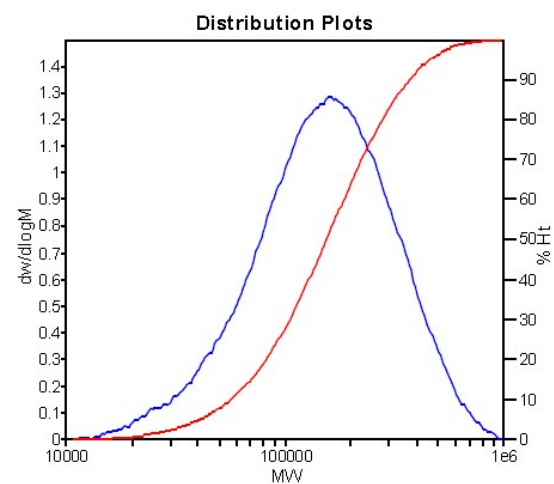

Figure S44. the GPC of Fe(II) complex **Fe7<sub>H</sub>** catalyzed polyisoprene (Table 2, entry 7)

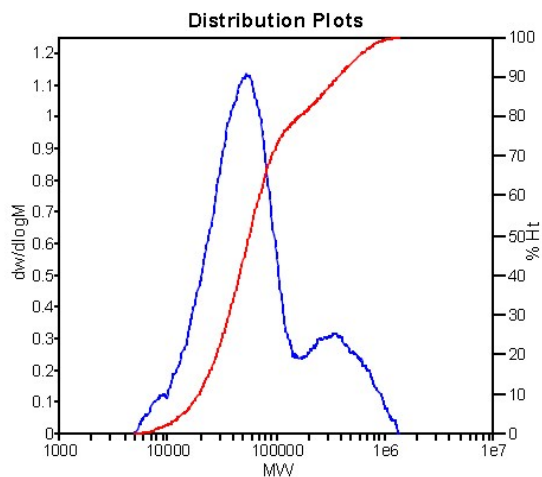

**Figure S45.** the GPC of Fe(II) complex **Fe<sub>8H</sub>** catalyzed polyisoprene (Table 3, entry 8)

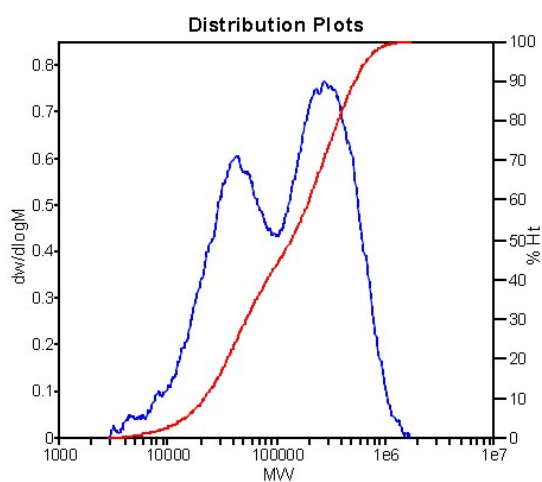

**Figure S46.** the GPC of Fe(II) complex **Fe<sub>9H</sub>** catalyzed polyisoprene (Table 3, entry 9)

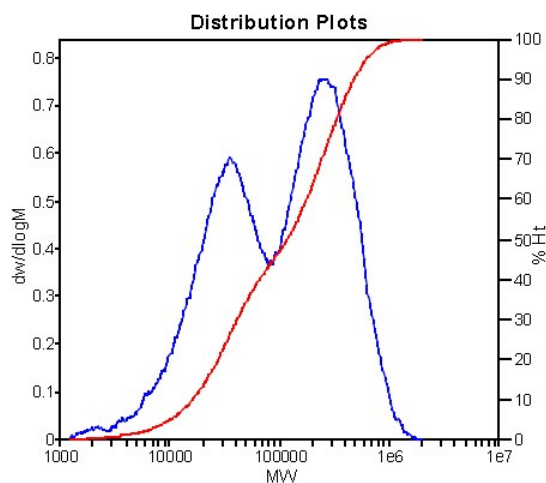

**Figure S47.** the GPC of Fe(II) complex **Fe<sub>10H</sub>** catalyzed polyisoprene (Table 3, entry 10)



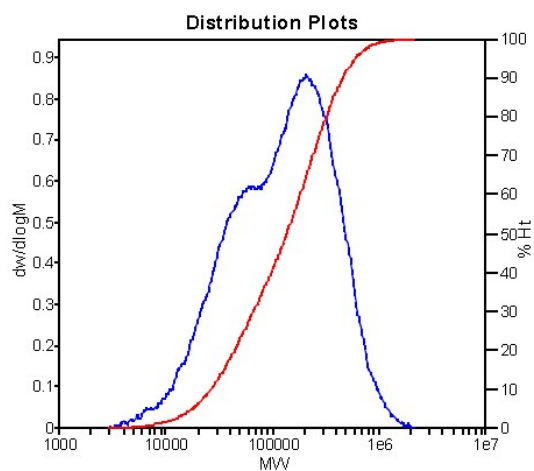

**Figure S48.** the GPC of Fe(II) complex **Fe11<sub>Me</sub>** catalyzed polyisoprene (Table 3, entry 11)

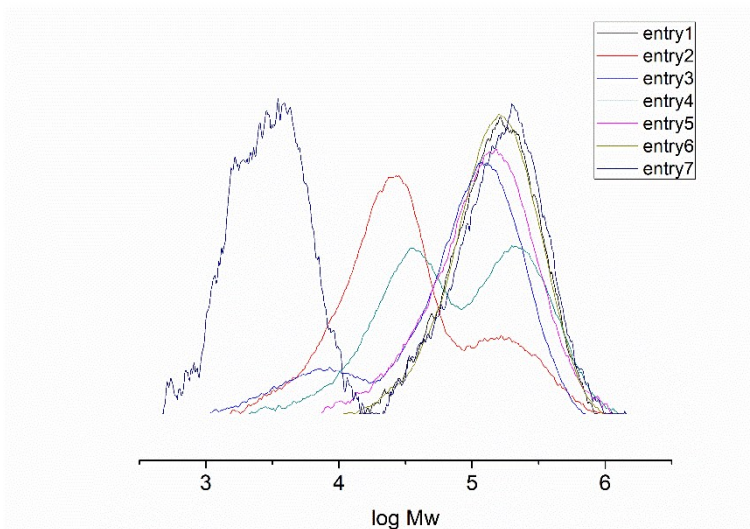

**Figure S49** the GPC of Fe(II) complex **Fe1<sub>H</sub> – Fe7<sub>H</sub>** catalyzed polyisoprene (Table 2, entries 1 – 7)

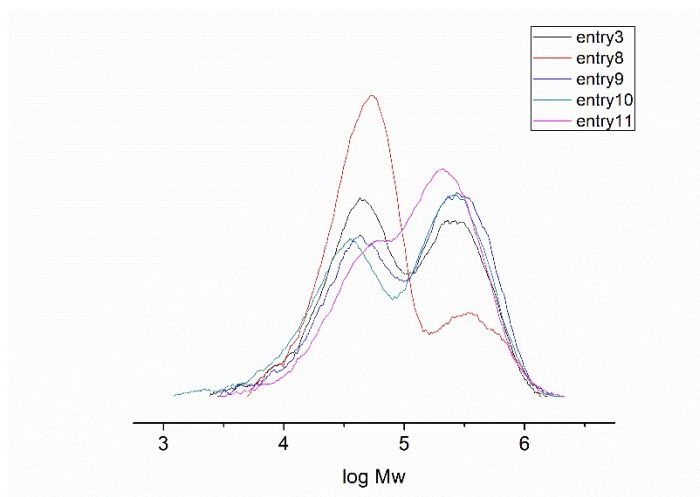

**Figure S50** the GPC of Fe(II) complex **Fe5<sub>H</sub>, Fe8<sub>H</sub> – Fe11<sub>Me</sub>** catalyzed polyisoprene (Table 3, entries 3, 8 – 11)

## 5. X-Ray Crystallography of Complexes

Fe<sub>3</sub>Me:CCDC number: 1884670;

### data reports

#### Abstract

**Table 1**

Experimental details

|                                                                                                                         |                                                                  |
|-------------------------------------------------------------------------------------------------------------------------|------------------------------------------------------------------|
| Crystal data                                                                                                            |                                                                  |
| Chemical formula                                                                                                        | C <sub>20</sub> H <sub>20</sub> Cl <sub>2</sub> FeN <sub>2</sub> |
| <i>M<sub>r</sub></i>                                                                                                    | 415.13                                                           |
| Crystal system, space group                                                                                             | Triclinic, $P\bar{1}$                                            |
| Temperature (K)                                                                                                         | 298                                                              |
| <i>a</i> , <i>b</i> , <i>c</i> (Å)                                                                                      | 8.9981 (8), 10.7524 (9), 11.3021 (11)                            |
| $\alpha$ , $\beta$ , $\gamma$ (°)                                                                                       | 89.495 (3), 66.730 (1), 79.902 (2)                               |
| <i>V</i> (Å <sup>3</sup> )                                                                                              | 986.77 (15)                                                      |
| <i>Z</i>                                                                                                                | 2                                                                |
| Radiation type                                                                                                          | Mo <i>K</i> $\alpha$                                             |
| $\mu$ (mm <sup>-1</sup> )                                                                                               | 1.04                                                             |
| Crystal size (mm)                                                                                                       | 0.22 × 0.15 × 0.10                                               |
| Data collection                                                                                                         |                                                                  |
| Diffractometer                                                                                                          | CCD area detector                                                |
| Absorption correction                                                                                                   | Multi-scan<br><i>SADABS</i>                                      |
| <i>T<sub>min</sub></i> , <i>T<sub>max</sub></i>                                                                         | 0.804, 0.903                                                     |
| No. of measured, independent and observed [ <i>I</i> > 2 $\sigma$ ( <i>I</i> )] reflections                             | 5011, 3435, 2225                                                 |
| <i>R<sub>int</sub></i>                                                                                                  | 0.048                                                            |
| ( <i>sin</i> $\theta$ / $\lambda$ ) <sub>max</sub> (Å <sup>-1</sup> )                                                   | 0.595                                                            |
| Refinement                                                                                                              |                                                                  |
| <i>R</i> [ <i>F</i> <sup>2</sup> > 2 $\sigma$ ( <i>F</i> <sup>2</sup> )], <i>wR</i> ( <i>F</i> <sup>2</sup> ), <i>S</i> | 0.054, 0.126, 1.01                                               |
| No. of reflections                                                                                                      | 3435                                                             |
| No. of parameters                                                                                                       | 227                                                              |
| No. of restraints                                                                                                       | 12                                                               |
| H-atom treatment                                                                                                        | H-atom parameters constrained                                    |
| $\Delta\rho_{max}$ , $\Delta\rho_{min}$ (e Å <sup>-3</sup> )                                                            | 0.49, -0.56                                                      |

Computer programs: Bruker *SMART*, Bruker *SHELXTL*, *SHELXS97* (Sheldrick, 1990), *SHELXL2018/3* (Sheldrick, 2018).

#### References

NOT FOUND

## Abstract

Table 1

## Experimental details

|                                                                                                                |                                                                                                                       |
|----------------------------------------------------------------------------------------------------------------|-----------------------------------------------------------------------------------------------------------------------|
| Crystal data                                                                                                   |                                                                                                                       |
| Chemical formula                                                                                               | C <sub>12</sub> H <sub>18</sub> Cl <sub>2</sub> FeN <sub>2</sub>                                                      |
| <i>M<sub>r</sub></i>                                                                                           | 317.03                                                                                                                |
| Crystal system, space group                                                                                    | Orthorhombic, <i>Pbca</i>                                                                                             |
| Temperature (K)                                                                                                | 293                                                                                                                   |
| <i>a</i> , <i>b</i> , <i>c</i> (Å)                                                                             | 9.1540 (8), 6.8673 (6), 42.281 (3)                                                                                    |
| <i>V</i> (Å <sup>3</sup> )                                                                                     | 2657.9 (4)                                                                                                            |
| <i>Z</i>                                                                                                       | 8                                                                                                                     |
| Radiation type                                                                                                 | Cu <i>K</i> α                                                                                                         |
| <i>μ</i> (mm <sup>-1</sup> )                                                                                   | 12.62                                                                                                                 |
| Crystal size (mm)                                                                                              | 0.30 × 0.15 × 0.05                                                                                                    |
| Data collection                                                                                                |                                                                                                                       |
| Diffractometer                                                                                                 | Xcalibur, Eos, Gemini                                                                                                 |
| Absorption correction                                                                                          | Multi-scan<br><i>SADABS</i>                                                                                           |
| <i>T<sub>min</sub></i> , <i>T<sub>max</sub></i>                                                                | 0.116, 0.571                                                                                                          |
| No. of measured, independent and observed [ <i>I</i> > 2σ( <i>I</i> )] reflections                             | 13972, 2242, 1618                                                                                                     |
| <i>R<sub>int</sub></i>                                                                                         | 0.115                                                                                                                 |
| (sin θ/λ) <sub>max</sub> (Å <sup>-1</sup> )                                                                    | 0.593                                                                                                                 |
| Refinement                                                                                                     |                                                                                                                       |
| <i>R</i> [ <i>F</i> <sup>2</sup> > 2σ( <i>F</i> <sup>2</sup> )], <i>wR</i> ( <i>F</i> <sup>2</sup> ), <i>S</i> | 0.099, 0.223, 1.09                                                                                                    |
| No. of reflections                                                                                             | 2242                                                                                                                  |
| No. of parameters                                                                                              | 154                                                                                                                   |
| H-atom treatment                                                                                               | H-atom parameters constrained<br>$w = 1/[\sigma^2(F_o^2) + (0.0583P)^2 + 28.0462P]$<br>where $P = (F_o^2 + 2F_c^2)/3$ |
| Δρ <sub>max</sub> , Δρ <sub>min</sub> (e Å <sup>-3</sup> )                                                     | 1.61, -0.73                                                                                                           |

Computer programs: *SHELXL2018/3* (Sheldrick, 2018).

Table 2

## Hydrogen-bond geometry (Å, °) for (1884491)

| <i>D</i> —H··· <i>A</i>            | <i>D</i> —H | H··· <i>A</i> | <i>D</i> ··· <i>A</i> | <i>D</i> —H··· <i>A</i> |
|------------------------------------|-------------|---------------|-----------------------|-------------------------|
| C8—H8 <i>A</i> ···Cl2 <sup>i</sup> | 0.97        | 2.83          | 3.538 (10)            | 131                     |
| C7—H7···Cl2                        | 0.98        | 2.85          | 3.451 (10)            | 121                     |
| C6—H6···Cl1                        | 0.93        | 2.95          | 3.525 (10)            | 121                     |
| C8—H8 <i>A</i> ···Cl2 <sup>i</sup> | 0.97        | 2.83          | 3.538 (10)            | 131                     |
| C7—H7···Cl2                        | 0.98        | 2.85          | 3.451 (10)            | 121                     |
| C6—H6···Cl1                        | 0.93        | 2.95          | 3.525 (10)            | 121                     |
| C8—H8 <i>A</i> ···Cl2 <sup>i</sup> | 0.97        | 2.83          | 3.538 (10)            | 131                     |

180703a.cif

1

---

data reports

---

|                                    |      |      |            |     |
|------------------------------------|------|------|------------|-----|
| C7—H7···C12                        | 0.98 | 2.85 | 3.451 (10) | 121 |
| C6—H6···C11                        | 0.93 | 2.95 | 3.525 (10) | 121 |
| C8—H8 <i>A</i> ···C12 <sup>i</sup> | 0.97 | 2.83 | 3.538 (10) | 131 |
| C7—H7···C12                        | 0.98 | 2.85 | 3.451 (10) | 121 |
| C6—H6···C11                        | 0.93 | 2.95 | 3.525 (10) | 121 |
| C6—H6···C11                        | 0.93 | 2.95 | 3.525 (10) | 121 |
| C7—H7···C12                        | 0.98 | 2.85 | 3.451 (10) | 121 |
| C8—H8 <i>A</i> ···C12 <sup>i</sup> | 0.97 | 2.83 | 3.538 (10) | 131 |
| C6—H6···C11                        | 0.93 | 2.95 | 3.525 (10) | 121 |
| C7—H7···C12                        | 0.98 | 2.85 | 3.451 (10) | 121 |
| C8—H8 <i>A</i> ···C12 <sup>i</sup> | 0.97 | 2.83 | 3.538 (10) | 131 |
| C6—H6···C11                        | 0.93 | 2.95 | 3.525 (10) | 121 |
| C7—H7···C12                        | 0.98 | 2.85 | 3.451 (10) | 121 |
| C8—H8 <i>A</i> ···C12 <sup>i</sup> | 0.97 | 2.83 | 3.538 (10) | 131 |

---

Symmetry code: (i)  $-x+1/2, y+1/2, z$ .

**References**

NOT FOUND

## Abstract

Table 1

## Experimental details

|                                                                                                                |                                                                                |
|----------------------------------------------------------------------------------------------------------------|--------------------------------------------------------------------------------|
| Crystal data                                                                                                   |                                                                                |
| Chemical formula                                                                                               | C <sub>28</sub> H <sub>32</sub> Cl <sub>4</sub> Fe <sub>2</sub> N <sub>4</sub> |
| <i>M<sub>r</sub></i>                                                                                           | 678.07                                                                         |
| Crystal system, space group                                                                                    | Monoclinic, <i>C2/c</i>                                                        |
| Temperature (K)                                                                                                | 298                                                                            |
| <i>a</i> , <i>b</i> , <i>c</i> (Å)                                                                             | 15.1785 (13), 9.3366 (8), 22.6274 (18)                                         |
| β (°)                                                                                                          | 103.782 (2)                                                                    |
| <i>V</i> (Å <sup>3</sup> )                                                                                     | 3114.3 (5)                                                                     |
| <i>Z</i>                                                                                                       | 4                                                                              |
| Radiation type                                                                                                 | Mo <i>K</i> α                                                                  |
| μ (mm <sup>-1</sup> )                                                                                          | 1.30                                                                           |
| Crystal size (mm)                                                                                              | 0.16 × 0.11 × 0.10                                                             |
| Data collection                                                                                                |                                                                                |
| Diffractionmeter                                                                                               | CCD area detector                                                              |
| Absorption correction                                                                                          | Multi-scan<br><i>SADABS</i>                                                    |
| <i>T<sub>min</sub></i> , <i>T<sub>max</sub></i>                                                                | 0.819, 0.881                                                                   |
| No. of measured, independent and observed [ <i>I</i> > 2σ( <i>I</i> )] reflections                             | 7713, 2739, 1864                                                               |
| <i>R<sub>int</sub></i>                                                                                         | 0.038                                                                          |
| (sin θ/λ) <sub>max</sub> (Å <sup>-1</sup> )                                                                    | 0.595                                                                          |
| Refinement                                                                                                     |                                                                                |
| <i>R</i> [ <i>F</i> <sup>2</sup> > 2σ( <i>F</i> <sup>2</sup> )], <i>wR</i> ( <i>F</i> <sup>2</sup> ), <i>S</i> | 0.034, 0.072, 1.04                                                             |
| No. of reflections                                                                                             | 2739                                                                           |
| No. of parameters                                                                                              | 189                                                                            |
| No. of restraints                                                                                              | 24                                                                             |
| H-atom treatment                                                                                               | H-atom parameters constrained                                                  |
| Δρ <sub>max</sub> , Δρ <sub>min</sub> (e Å <sup>-3</sup> )                                                     | 0.34, -0.22                                                                    |

Computer programs: *SHELXL2018/3* (Sheldrick, 2018).

Table 2

## Hydrogen-bond geometry (Å, °) for (1884672)

| <i>D</i> —H··· <i>A</i>   | <i>D</i> —H | H··· <i>A</i> | <i>D</i> ··· <i>A</i> | <i>D</i> —H··· <i>A</i> |
|---------------------------|-------------|---------------|-----------------------|-------------------------|
| C5—H5···Cl2 <sup>i</sup>  | 0.93        | 2.95          | 3.867 (3)             | 168                     |
| C6—H6···Cl1 <sup>ii</sup> | 0.93        | 2.83          | 3.431 (3)             | 123                     |
| C8—H8···Cl1               | 0.98        | 2.96          | 3.488 (3)             | 115                     |

Symmetry codes: (i)  $-x+1, -y+1, -z+2$ ; (ii)  $-x+1, -y+2, -z+2$ .

## Abstract

Table 1

Experimental details

|                                                                            |                                                                  |
|----------------------------------------------------------------------------|------------------------------------------------------------------|
| Crystal data                                                               |                                                                  |
| Chemical formula                                                           | C <sub>14</sub> H <sub>18</sub> Cl <sub>2</sub> FeN <sub>2</sub> |
| $M_r$                                                                      | 339.04                                                           |
| Crystal system, space group                                                | Monoclinic, $P2_1/c$                                             |
| Temperature (K)                                                            | 298                                                              |
| $a, b, c$ (Å)                                                              | 7.0439 (7), 13.0684 (11), 16.9522 (12)                           |
| $\beta$ (°)                                                                | 90.761 (1)                                                       |
| $V$ (Å <sup>3</sup> )                                                      | 1560.4 (2)                                                       |
| $Z$                                                                        | 4                                                                |
| Radiation type                                                             | Mo $K\alpha$                                                     |
| $\mu$ (mm <sup>-1</sup> )                                                  | 1.30                                                             |
| Crystal size (mm)                                                          | 0.48 × 0.42 × 0.40                                               |
| Data collection                                                            |                                                                  |
| Diffractionmeter                                                           | CCD area detector                                                |
| Absorption correction                                                      | Multi-scan<br><i>SADABS</i>                                      |
| $T_{\min}, T_{\max}$                                                       | 0.575, 0.625                                                     |
| No. of measured, independent and observed [ $I > 2\sigma(I)$ ] reflections | 7388, 2760, 2052                                                 |
| $R_{\text{int}}$                                                           | 0.029                                                            |
| $(\sin \theta/\lambda)_{\text{max}}$ (Å <sup>-1</sup> )                    | 0.595                                                            |
| Refinement                                                                 |                                                                  |
| $R[F^2 > 2\sigma(F^2)], wR(F^2), S$                                        | 0.035, 0.092, 1.06                                               |
| No. of reflections                                                         | 2760                                                             |
| No. of parameters                                                          | 173                                                              |
| H-atom treatment                                                           | H-atom parameters constrained                                    |
| $\Delta\rho_{\text{max}}, \Delta\rho_{\text{min}}$ (e Å <sup>-3</sup> )    | 0.26, -0.37                                                      |

Computer programs: *SHELXL2018/3* (Sheldrick, 2018).

Table 2

Hydrogen-bond geometry (Å, °) for (1884671)

| $D-H\cdots A$                   | $D-H$ | $H\cdots A$ | $D\cdots A$ | $D-H\cdots A$ |
|---------------------------------|-------|-------------|-------------|---------------|
| N2—H2 $\cdots$ Cl2 <sup>i</sup> | 0.98  | 2.39        | 3.364 (2)   | 175           |

Symmetry code: (i)  $-x, -y, -z+2$ .

## References

NOT FOUND

6. NMR spectrum of L<sub>2H</sub> ligand deprotonated by AlMe<sub>3</sub>

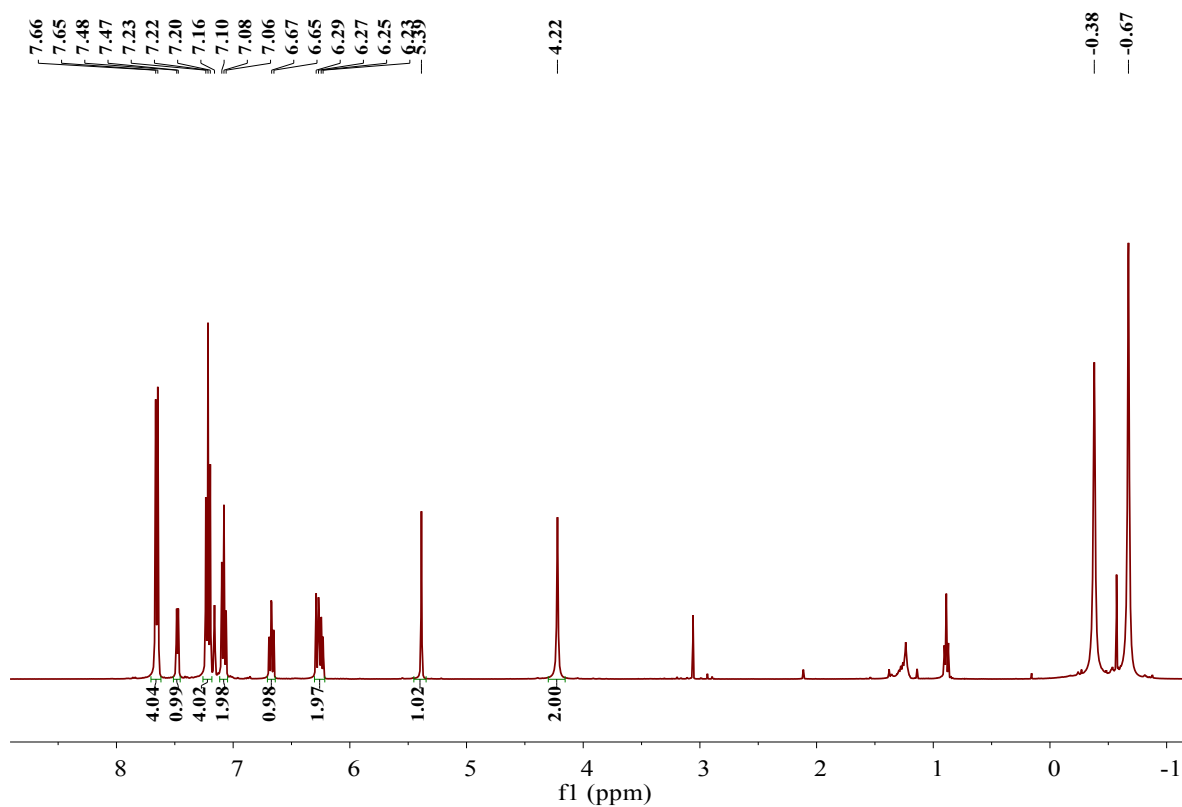

Figure S51 <sup>1</sup>H NMR spectrum (400 MHz, C<sub>6</sub>D<sub>6</sub>, 298 K)

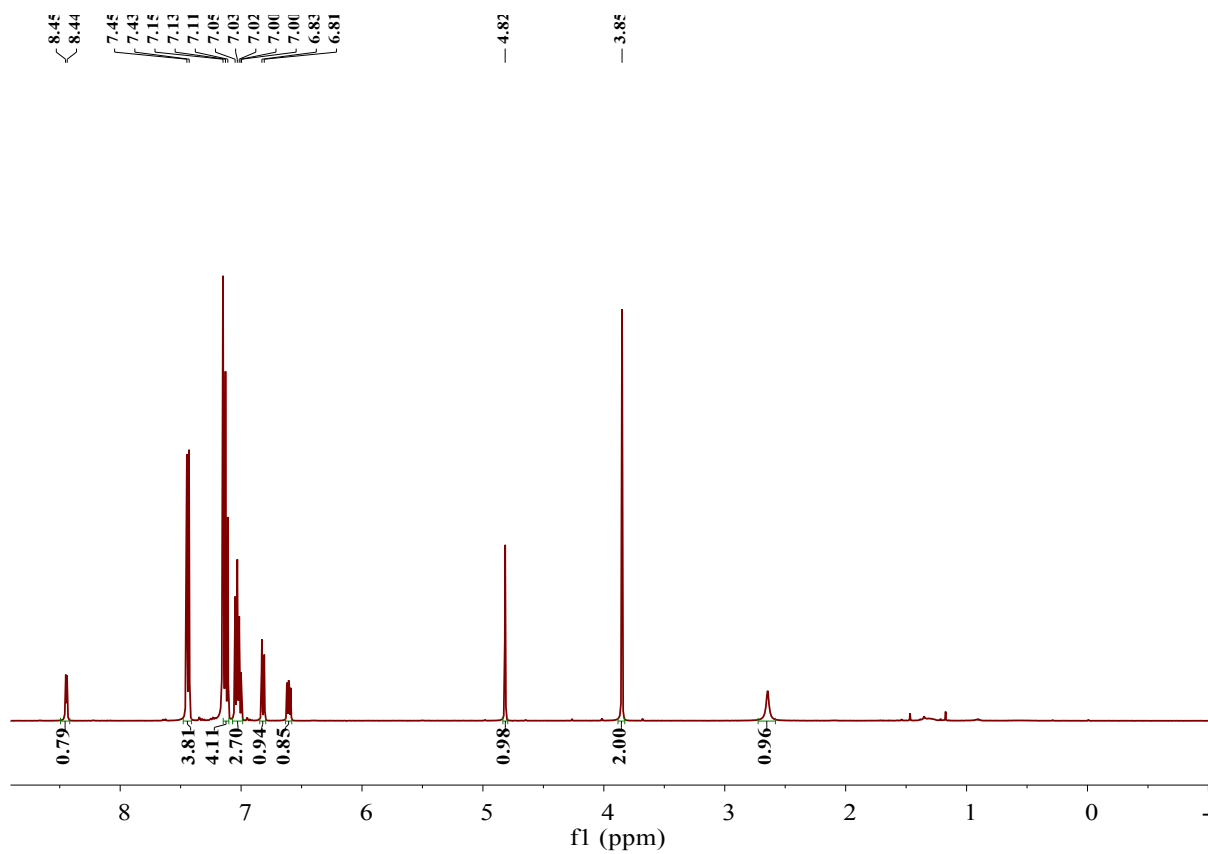

Figure S52. <sup>1</sup>H NMR spectrum (400 MHz, C<sub>6</sub>D<sub>6</sub>, 298 K) of L<sub>2H</sub>

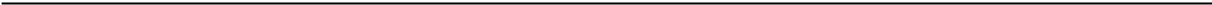

Supplement: c9dt00452a1.pdf [file c9dt00452a1.pdf]
